# Supplementary material for: CO2 cleavage by tantalum/M (M = iridium, osmium) heterobimetallic complexes
Source: Royal Society of Chemistry journal article supplement (doi:10.1039/d4cc02207f), 2024-01-01
Supplement: d4cc02207f1.pdf [file d4cc02207f1.pdf]

# Supporting Information

## CO<sub>2</sub> Cleavage by Tantalum/M (M = Iridium, Osmium) Heterobimetallic Complexes

Abdelhak Lachguar,<sup>a</sup> Christopher Z. Ye,<sup>b,c</sup> Sheridan N. Kelly,<sup>b,c</sup> Erwann Jeanneau,<sup>d</sup> Iker Del Rosal,<sup>e</sup> Laurent Maron,<sup>e</sup> Laurent Veyre,<sup>a</sup> Chloé Thieuleux,<sup>a</sup> John Arnold,<sup>\*b,c</sup> and Clément Camp<sup>\*a</sup>

*a.* Laboratory of Catalysis, Polymerization, Processes & Materials (CP2M UMR 5128), CNRS, Université Claude Bernard Lyon 1, CPE-Lyon, 43 Bvd du 11 Novembre 1918, 69616 Villeurbanne, France. E-mail: [clement.camp@univ-lyon1.fr](mailto:clement.camp@univ-lyon1.fr)

*b.* Department of Chemistry, University of California, Berkeley, California 94720, USA. E-mail: [arnold@berkeley.edu](mailto:arnold@berkeley.edu)

*c.* Chemical Sciences Division, Lawrence Berkeley National Laboratory, Berkeley, California 94720, USA.

*d.* Centre de Diffraction Henri Longchambon, Université Claude Bernard Lyon 1, 5 Rue de la Doua, 69100 Villeurbanne, France.

*e.* Université de Toulouse, CNRS, INSA, UPS, UMR5215, LCPNO, 135 Avenue de Rangueil, F-31077 Toulouse, France.

### Authors Contributions

A. Lachguar and C. Z. Ye conducted the synthetic experimental work, with C. Z. Ye focusing on the synthesis of the starting materials [Cp\*ReH<sub>6</sub>] and [Cp\*OsH<sub>5</sub>], and A. Lachguar handling the remaining aspects. S. N. Kelly and E. Jeanneau recorded and interpreted the XRD data. A. Lachguar drafted the original version of the manuscript. I. Del Rosal and L. Maron carried out the computational work. J. Arnold, C. Camp conceptualized the research by securing funding and administered the project. J. Arnold, C. Camp, L. Veyre and C. Thieuleux supervised the work, interpreted the data, revised and edited subsequently the manuscript. All authors have read and agreed to the published version of the manuscript.

### Content

|                                      |    |
|--------------------------------------|----|
| A. Experimental section .....        | 2  |
| B. NMR, DRIFT and HRMS spectra ..... | 4  |
| C. X-ray crystallography .....       | 16 |
| D. Computational data.....           | 17 |
| E. References.....                   | 57 |

## A. Experimental section

**General Considerations.** Unless otherwise noted, all reactions were performed either using standard Schlenk line techniques or in an MBRAUN glovebox under an atmosphere of purified argon or nitrogen (<1 ppm of O<sub>2</sub>/H<sub>2</sub>O). Glassware and cannulas were stored in an oven at ~100 °C for at least 16 h prior to use. THF and *n*-pentane were purified by passage through a column of activated alumina, dried over Na/benzophenone, vacuum-transferred to a storage flask, and freeze-pump-thaw degassed prior to use. Deuterated solvents (toluene-d<sub>8</sub>, THF-d<sub>8</sub> and C<sub>6</sub>D<sub>6</sub>) were dried over Na/benzophenone, vacuum-transferred to a storage flask, and freeze-pump-thaw degassed prior to use. Compounds [Cp\*OsH<sub>5</sub>],<sup>1</sup> [Ta(CH*t*Bu)(CH<sub>2</sub>*t*Bu)<sub>3</sub>]<sup>2</sup> and [Ta(CH<sub>2</sub>*t*Bu)<sub>3</sub>(H)<sub>2</sub>IrCp\*]<sup>3</sup> were prepared according to the literature procedures. All other reagents were acquired from commercial sources and used as received.

**IR Spectroscopy.** The samples were prepared in a glovebox (diluted in dry KBr), sealed under argon in a DRIFT cell fitted with KBr windows, then analyzed using a Nicolet 670 FT-IR spectrometer.

**Elemental Analyses.** Elemental analyses were performed under an inert atmosphere at either Mikroanalytisches Labor Pascher (Germany) or the Microanalytical Facility at the College of Chemistry, University of California, Berkeley (USA).

**Mass Spectroscopy.** High-resolution mass spectrometry (HRMS) was performed at the Centre Commun de Spectrométrie de Masse (CCSM) in Villeurbanne (France), using the Bruker QTOF Impact II spectrometer, with the APCI source and direct introduction *via* Solid Probe.

**NMR Spectroscopy.** Solution NMR spectra were recorded on Bruker AV-300, AV-500 and AV-600 spectrometers. <sup>1</sup>H and <sup>13</sup>C chemical shifts were measured relative to residual solvent peaks, which were assigned relative to an external TMS standard set at 0.00 ppm. <sup>1</sup>H and <sup>13</sup>C NMR assignments were confirmed by <sup>1</sup>H–<sup>1</sup>H COSY, <sup>1</sup>H–<sup>13</sup>C HSQC and HMBC experiments. NMR data recorded as follows: chemical shift (δ) [multiplicity, coupling constant(s) J (Hz), relative integral].

**Synthesis of [Ta(CH<sub>2</sub>*t*Bu)<sub>3</sub>(μ-H)<sub>3</sub>Os(Cp\*)] (2).** A colourless pentane solution (5 mL) of Cp\*OsH<sub>5</sub> (143 mg, 0.431 mmol, 1 equiv.) was added dropwise to a dark-brown pentane solution (5 mL) of Ta(CH*t*Bu)(CH<sub>2</sub>*t*Bu)<sub>3</sub> (200 mg, 0.431 mmol, 1 equiv.). The reaction mixture turned red and was stirred at room temperature for 2 h. Volatiles were removed under vacuum affording pure **2** as a red powder (305 mg, 0.422 mmol, 98%). Single crystals of **2** suitable for X-ray diffraction were obtained through recrystallization in a minimal amount of pentane at -35 °C. <sup>1</sup>H-NMR (600 MHz, toluene-d<sub>8</sub>, 302 K) δ ppm 2.20 (s, 15 H, 5 CH<sub>3</sub><sup>Cp\*</sup>), 1.29 (s, 27 H, 3 C(CH<sub>3</sub>)<sub>3</sub>), 0.32 (s, 6 H, 3 CH<sub>2</sub>C(CH<sub>3</sub>)<sub>3</sub>), -6.90 (s, 3 H, OsH<sub>3</sub>). <sup>1</sup>H-NMR (300 MHz, C<sub>6</sub>D<sub>6</sub>, 298 K) δ ppm 2.21 (s, 15 H, 5 CH<sub>3</sub><sup>Cp\*</sup>), 1.32 (s, 27 H, 3 C(CH<sub>3</sub>)<sub>3</sub>),

0.34 (s, 6 H, 3  $\underline{\text{CH}}_2\text{C}(\text{CH}_3)_3$ ), -6.80 (s, 3 H,  $\text{Os}\underline{\text{H}}_3$ ).  $^{13}\text{C}\{^1\text{H}\}$ -NMR (151 MHz, toluene- $d_8$ , 302 K)  $\delta$  ppm 120.12 (s, 3 C, 3  $\text{Ta}\underline{\text{C}}\text{H}_2\text{C}(\text{CH}_3)_3$ ), 86.76 (s, 5 C,  $\underline{\text{C}}_5(\text{CH}_3)_5$ ), 35.21 (s, 3 C, 3  $\text{Ta}\underline{\text{C}}\text{H}\underline{\text{C}}(\text{CH}_3)_3$ ), 34.86 (s, 9 C, 3  $\text{Ta}\underline{\text{C}}\text{H}\underline{\text{C}}(\underline{\text{C}}\text{H}_3)_3$ ), 11.71 (s, 5 C,  $\text{C}_5(\underline{\text{C}}\text{H}_3)_5$ ). FTIR (293 K,  $\text{cm}^{-1}$ )  $\nu$  = 2924 (br s,  $\nu_{\text{C-H}}$ ), 2856 (s,  $\nu_{\text{C-H}}$ ), 2735 (s,  $\nu_{\text{C-H}}$ ), 2670 (s,  $\nu_{\text{C-H}}$ ), 1957 (s,  $\nu_{\text{Os-H}}$ ), 1339 (s), 1230 (s), 1071 (s), 1033 (s), 933 (s), 913 (s), 754 (s), 547 (s), 488 (s). Anal. Calcd for  $\text{C}_{25}\text{H}_{51}\text{OsTa}$ : C, 41.54; H, 7.11 Found: C, 42.34; H, 7.05.

### Reactivity of compound 1 (or 2) with $\text{CO}_2$ .

In a J-Young NMR tube, a solution of complex **1** (or **2**) (10 mg, 0.014 mmol) in THF- $d_8$  (1 mL) was freeze-pumped and subsequently exposed to a  $\text{CO}_2$  atmosphere (1 atm, ca. 2 mL headspace, ca. 0.08 mmol). The solution turned colourless within a few minutes (ca. 10 min), indicating the complete consumption of complex **1** (or **2**). Note that diffusion of  $\text{CO}_2$  gas in the solution is more limiting (slower) than the chemical kinetics with both complexes, preventing the accurate measurement of kinetics. The quantitative and clean formation of compounds **3** (or **4**) and **5** was determined by  $^1\text{H}$  NMR analysis of the crude reaction (refer to Figures 7 and 8). The volatiles were evaporated under vacuum. The resulting crude product was then washed with pentane (3x1 mL) and dried under vacuum to yield  $[\text{Ta}(\text{O})(\text{CH}_2\text{tBu})_3]_x$  **5** as a white powder with a yield of 94% (5.3 mg) and 95% (5.4 mg) respectively from compound **1** and **2**. The solutions resulting from the pentane washings of the residue were combined, and the pentane was evaporated to yield: complex **3** as a light yellow solid with a yield of 96% (4.7 mg), and complex **4** as a white solid with a yield of 45% (2.2 mg). A similar yield was also obtained from similar procedure starting with 100 mg (0.14 mmol) of compound **1** (or **2**) dissolved in 5 mL of THF and exposed to  $\text{CO}_2$  (1 atm, 70.5 mL headspace, 2.84 mmol).

**Characterization of compound 3:**  $^1\text{H}$ -NMR (500 MHz,  $\text{C}_6\text{D}_6$ , 298 K)  $\delta$  ppm 1.88 (s, 15 H, 5  $\underline{\text{C}}\text{H}_3^{\text{Cp}^*}$ ), -15.75 (s, 2 H,  $\text{Ir}\underline{\text{H}}_2$ ).  $^{13}\text{C}\{^1\text{H}\}$ -NMR (126 MHz,  $\text{C}_6\text{D}_6$ , 298 K)  $\delta$  ppm 97.16 (s, 5 C,  $\underline{\text{C}}_5(\text{CH}_3)_5$ ), 10.69 (s, 5 C,  $\text{C}_5(\underline{\text{C}}\text{H}_3)_5$ ). These data agree with the previously published ones.<sup>4,5</sup>

**Characterization of compound 4:**  $^1\text{H}$ -NMR (500 MHz, THF- $d_8$ , 298 K)  $\delta$  ppm 2.26 (s, 15 H, 5  $\underline{\text{C}}\text{H}_3^{\text{Cp}^*}$ ), -10.47 (s\*, 1 H, trans  $\text{Os}\underline{\text{H}}$ ), -12.50 (s\*, 2 H, cis  $\text{Os}\underline{\text{H}}$ ).  $^{13}\text{C}\{^1\text{H}\}$ -NMR (126 MHz, THF- $d_8$ , 298 K)  $\delta$  ppm 184.63 (s, 1 C,  $\underline{\text{C}}\text{O}$ ), 98.46 (s, 5 C,  $\underline{\text{C}}_5(\text{CH}_3)_5$ ), 11.64 (s, 5 C,  $\text{C}_5(\underline{\text{C}}\text{H}_3)_5$ ). These data agree with the previously published ones.<sup>6</sup> \*Note that in the original publication the NMR data was recorded at  $-50^\circ\text{C}$  in  $\text{CD}_2\text{Cl}_2$  and the hydride signals appeared as a doublet and a triplet due to mutual coupling. However, under our experimental conditions (500 MHz, THF- $d_8$ , 298 K) the fine structure is not visible and thus these  $^1\text{H}$  hydride signals appear as pseudo-singlets. (see Figure S13).

**Characterization of compound 5:**  $^1\text{H}$ -NMR (500 MHz, THF- $d_8$ , 298 K)  $\delta$  ppm 1.12 (s, 27 H, 3  $\text{C}(\underline{\text{C}}\text{H}_3)_3$ ), 0.55 (s, 6 H, 3  $\underline{\text{C}}\text{H}_2\text{C}(\text{CH}_3)_3$ ).  $^{13}\text{C}\{^1\text{H}\}$ -NMR (126 MHz, THF- $d_8$ , 298 K)  $\delta$  ppm 104.44 (s, 3 C, 3  $\text{Ta}(\text{O})\underline{\text{C}}\text{H}_2\text{C}(\text{CH}_3)_3$ ), 35.13 (s, 3 C, 3  $\text{Ta}(\text{O})\underline{\text{C}}\text{H}_2\underline{\text{C}}(\text{CH}_3)_3$ ), 34.40 (s, 9 C, 3  $\text{Ta}(\text{O})\underline{\text{C}}\text{H}_2\underline{\text{C}}(\underline{\text{C}}\text{H}_3)_3$ ). HRMS (APCI- $\text{SP}^+$ ) Calcd for  $\text{C}_{15}\text{H}_{34}\text{OTa}$   $[\text{M}+\text{H}]^+$ : 411.2084 Found: 411.2086. Anal. Calcd for  $\text{C}_{15}\text{H}_{33}\text{OTa}$ : C, 43.90; H, 8.11; Found: C, 43.45; H, 7.95.

## B. NMR, DRIFT and HRMS spectra

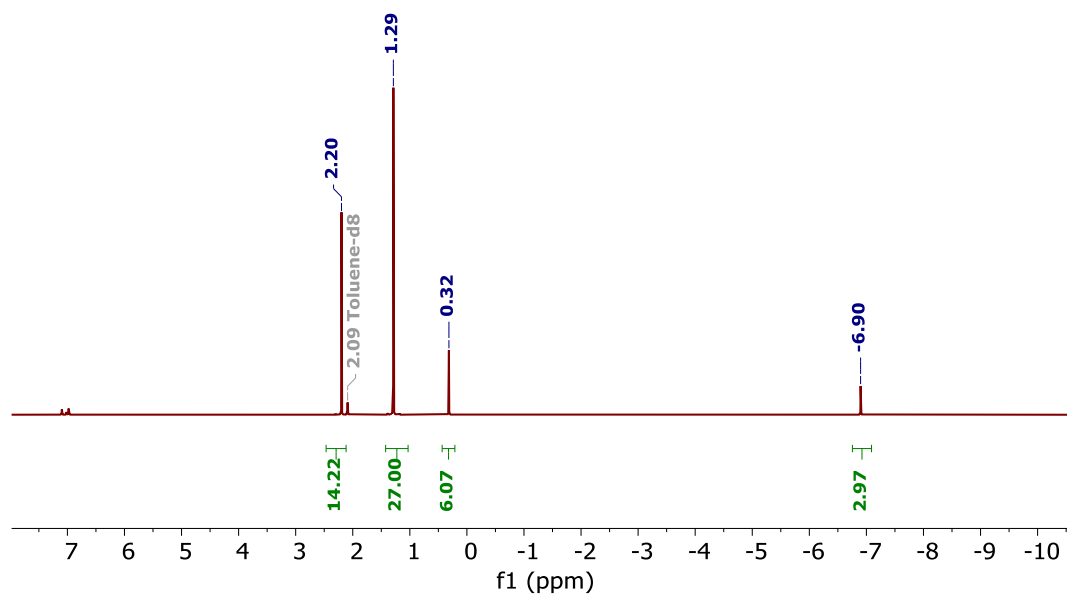

**Figure S1.**  $^1\text{H-NMR}$  spectrum (600 MHz, toluene- $d_8$ , 302 K) of compound **2**.

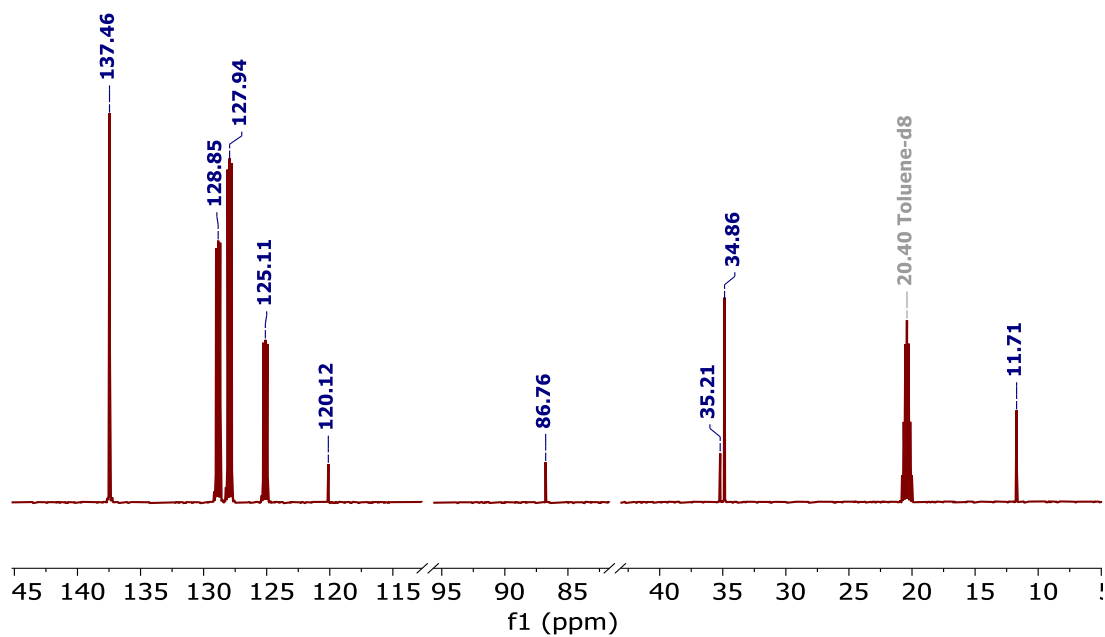

**Figure S2.**  $^{13}\text{C}\{^1\text{H}\}$ -NMR spectrum (151 MHz, toluene- $d_8$ , 302 K) of compound **2**.

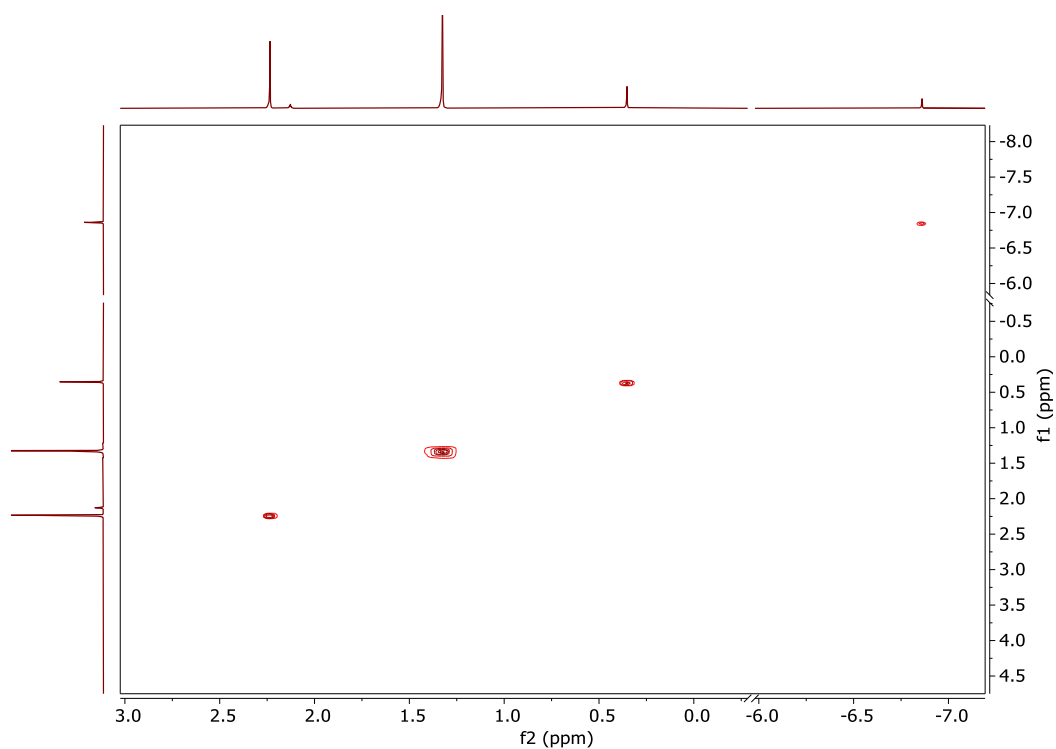

**Figure S3.**  $^1\text{H}$ - $^1\text{H}$  COSY NMR spectrum (600 MHz, toluene- $d_8$ , 302 K) of compound **2**.

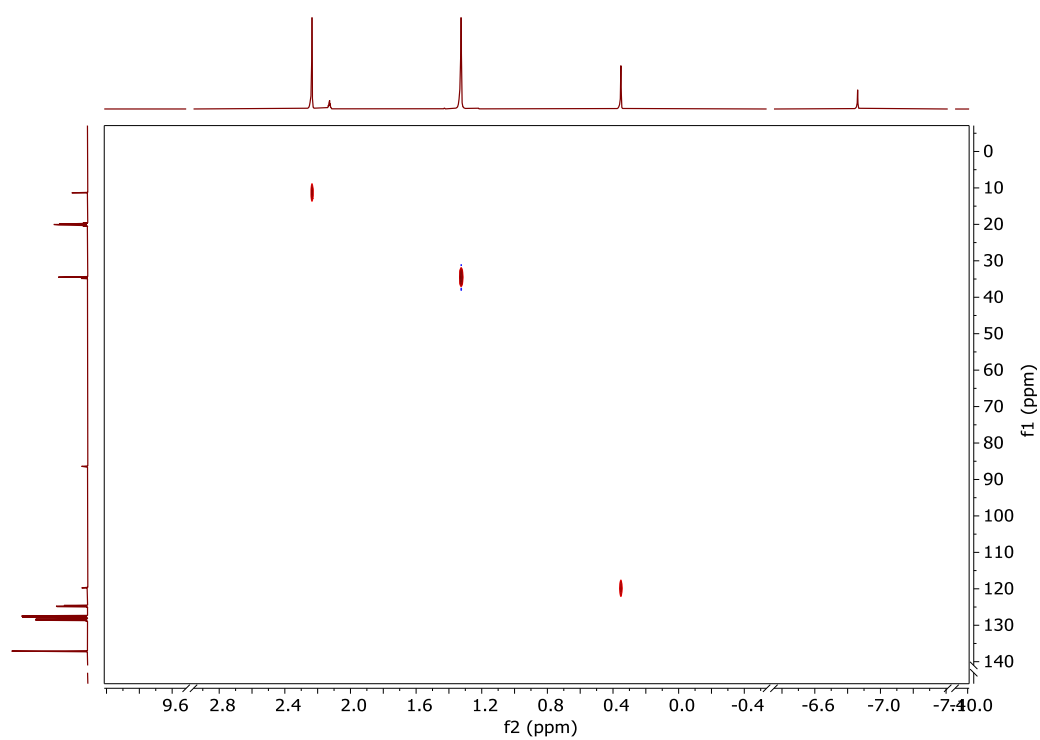

**Figure S4.**  $^1\text{H}$ - $^{13}\text{C}$  HSQC NMR spectrum (600 MHz, toluene- $d_8$ , 302 K) of compound **2**.

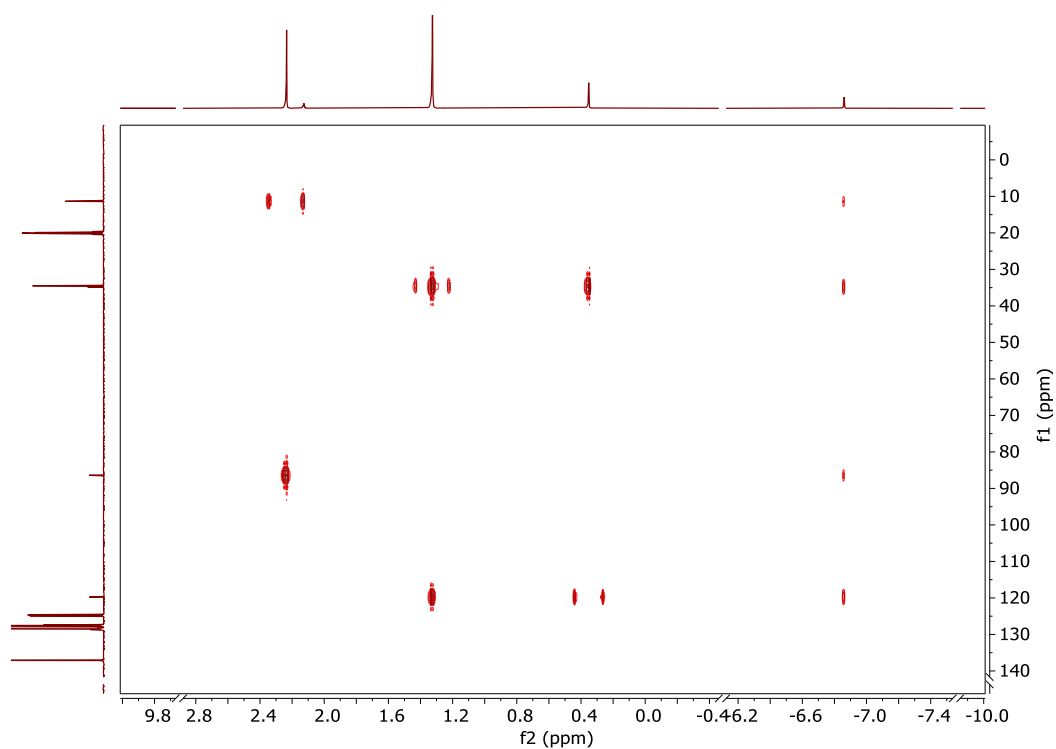

**Figure S5.**  $^1\text{H}$ - $^{13}\text{C}$  HMBC NMR spectrum (600 MHz, toluene- $d_8$ , 302 K) of compound **2**.

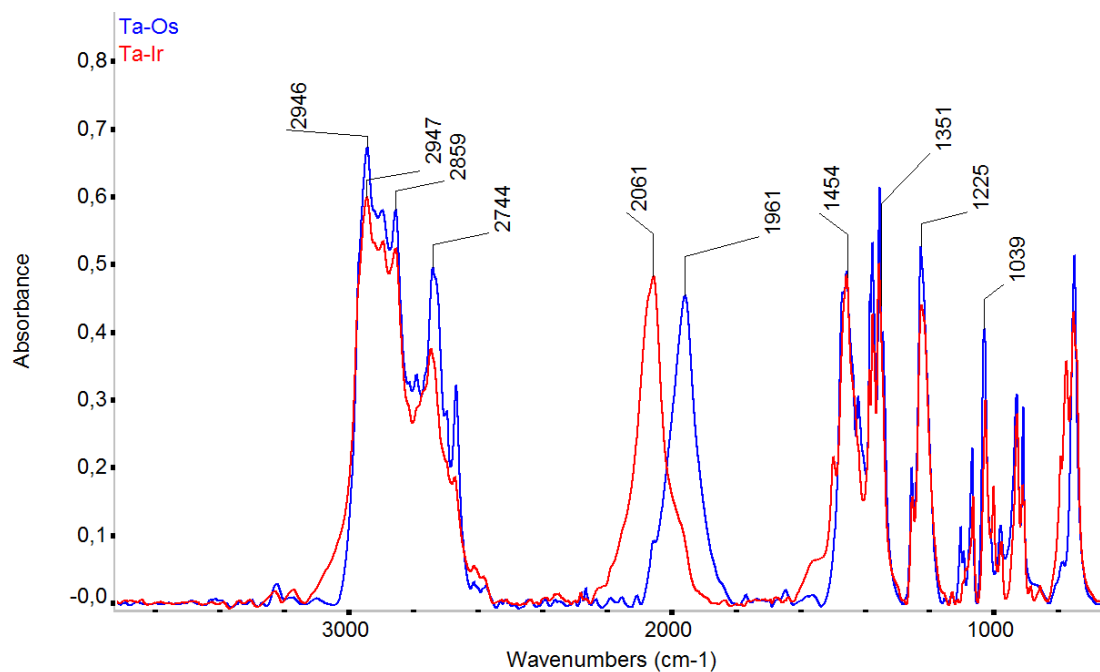

**Figure S6.** DRIFT (293 K,  $\text{cm}^{-1}$ ) spectra of compounds **1** (in red) and **2** (in blue).

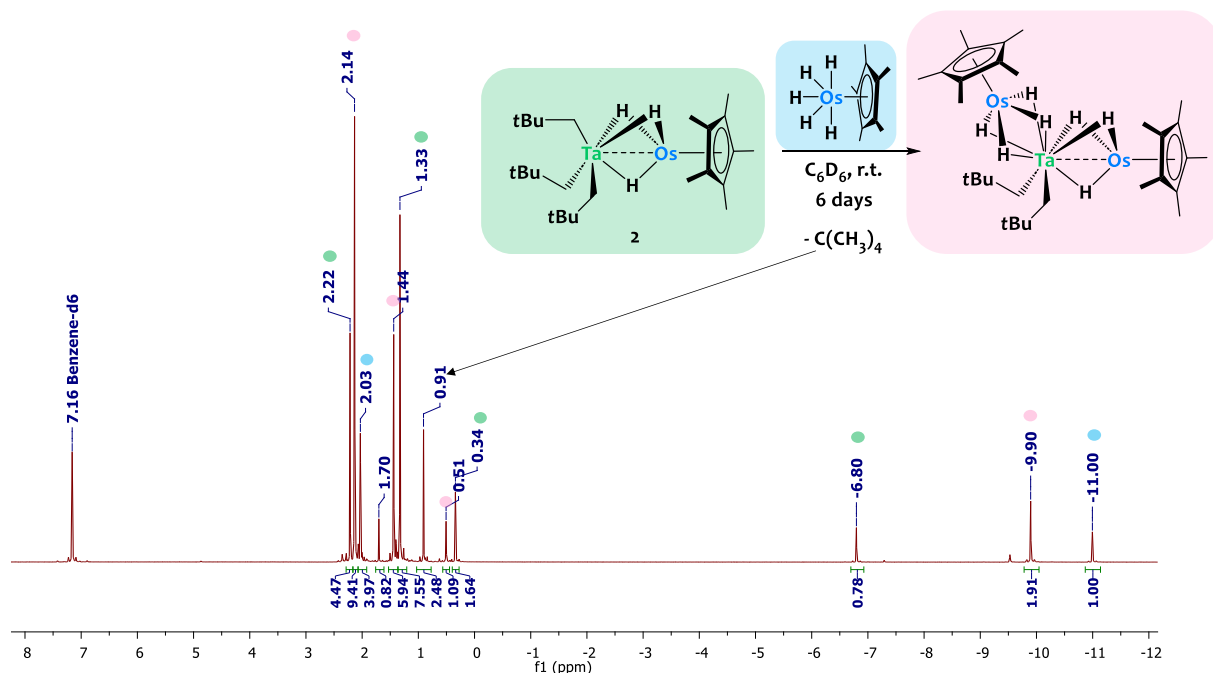

**Figure S7.**  $^1\text{H-NMR}$  spectrum (300 MHz,  $\text{C}_6\text{D}_6$ , 298 K) of the crude reaction mixture of **2** with  $\text{Cp}^*\text{OsH}_5$  after 6 days in  $\text{C}_6\text{D}_6$ . We observe the slow formation of a new trinuclear species by protonolysis and formation of neopentane ( $\delta\ ^1\text{H} = 0.91$  ppm). A similar iridium analogue was isolated previously in our group (S. Lassalle et al., *J. Catal.*, 2020, **392**, 287–301). Attempts to heat the reaction mixture to speed up the process lead instead to the decomposition of the starting materials.

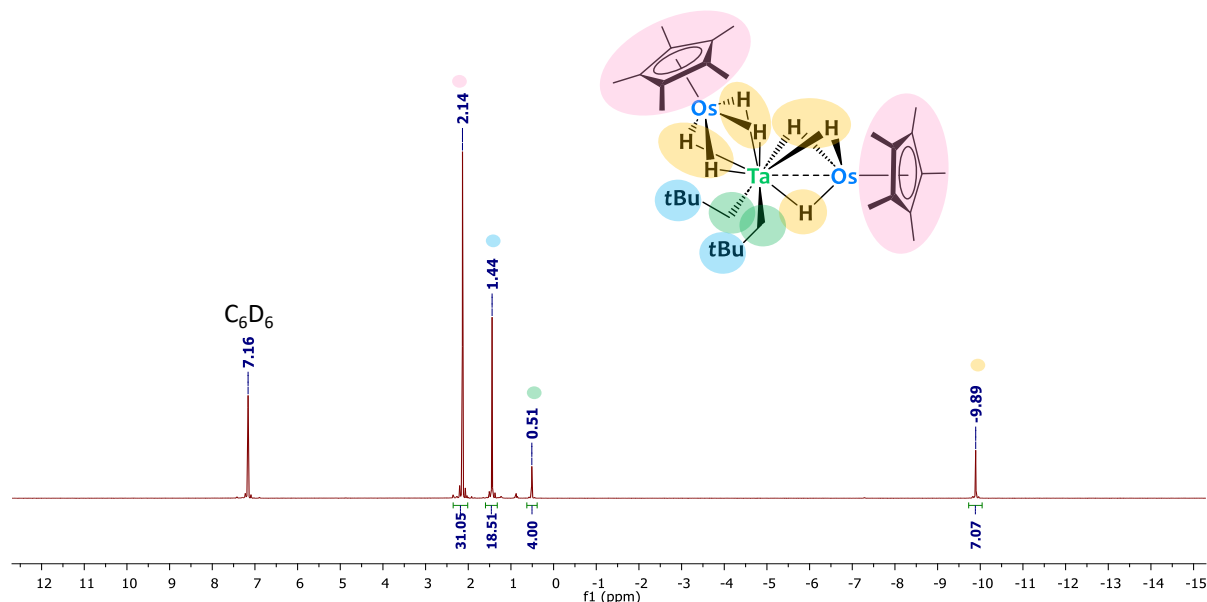

**Figure S8.**  $^1\text{H-NMR}$  spectrum (300 MHz,  $\text{C}_6\text{D}_6$ , 298 K) of the trinuclear TaOs $_2$  complex isolated in 10% yield as a black precipitate upon taking the reaction mixture from Figure S7 to dryness, extraction in pentane and cooling to  $-40^\circ\text{C}$  for 1 night.

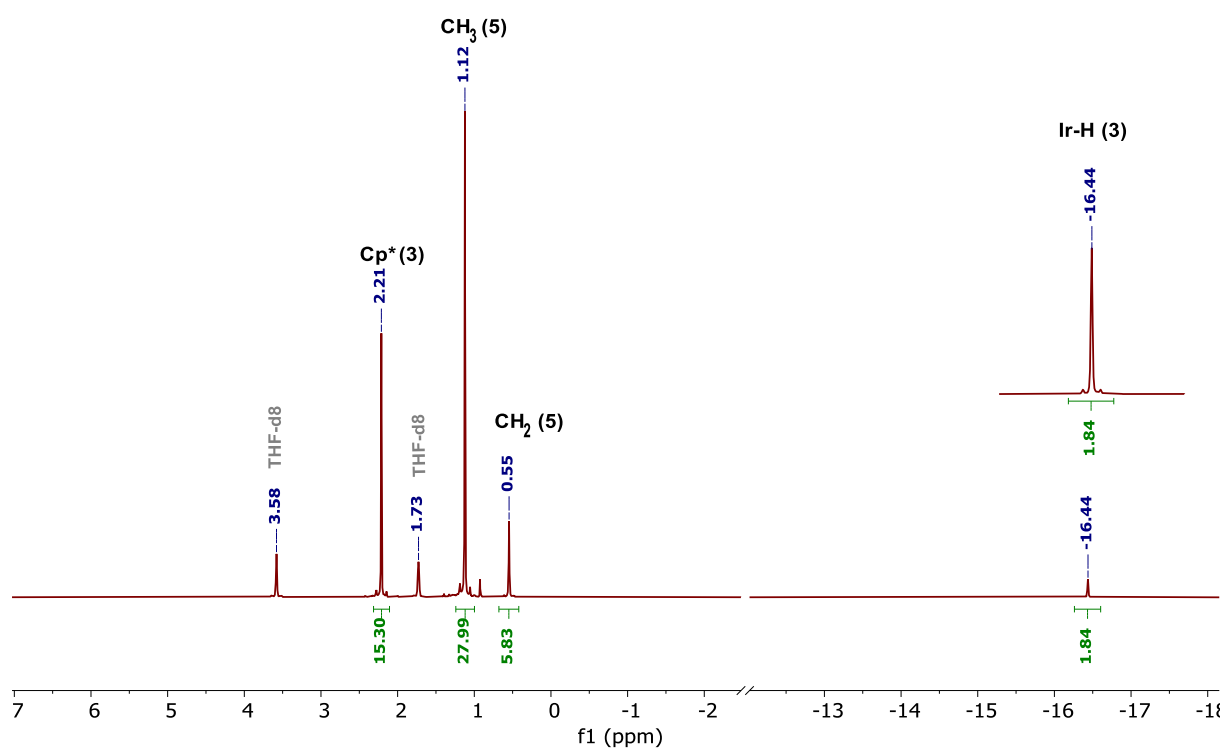

**Figure S9.**  $^1\text{H-NMR}$  spectrum (300 MHz,  $\text{THF-d}_8$ , 298 K) of the crude reaction mixture of **1** with 1 atm of  $\text{CO}_2$  after 60 min in  $\text{THF-d}_8$ . We observe the complete consumption of complex **1** and the quantitative formation of  $\text{Cp}^*\text{Ir}(\text{CO})\text{H}_2$  **3** and  $[\text{Ta}(\text{O})(\text{CH}_2\text{tBu})_3]_x$  **5**.



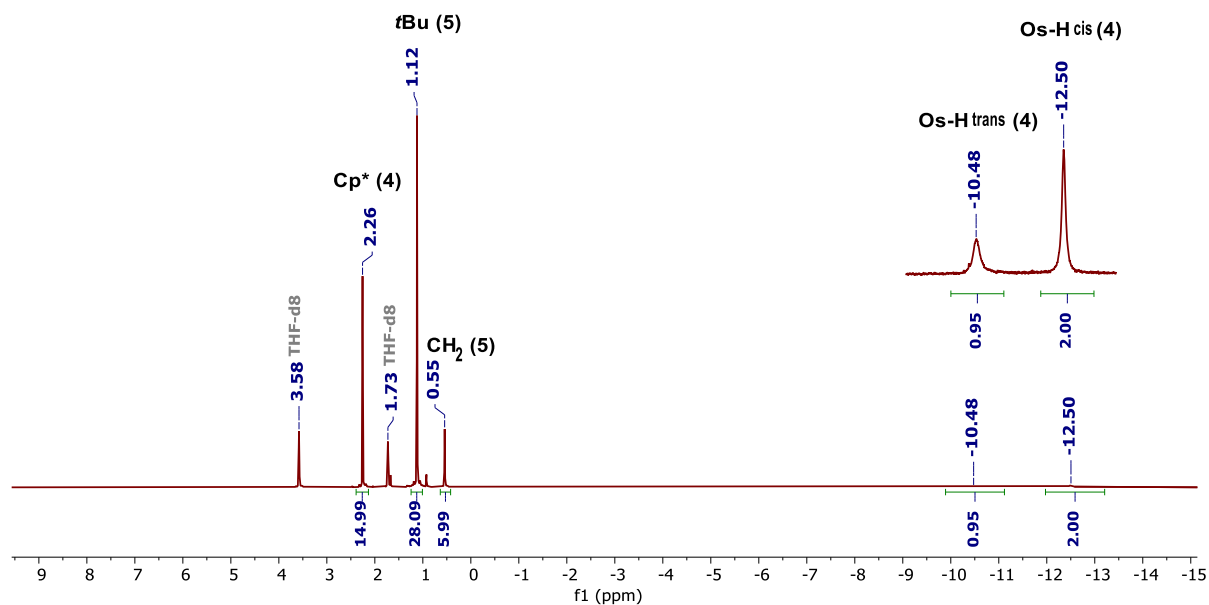

**Figure S10.**  $^1\text{H-NMR}$  spectrum (300 MHz,  $\text{THF-d}_8$ , 298 K) of the crude reaction mixture of **2** with 1 atm of  $\text{CO}_2$  after 90 min in  $\text{THF-d}_8$ . We observe the complete consumption of complex **2** and the quantitative formation of  $\text{Cp}^*\text{Os}(\text{CO})\text{H}_3$  **4** and  $[\text{Ta}(\text{O})(\text{CH}_2t\text{Bu})_3]_x$  **5**.

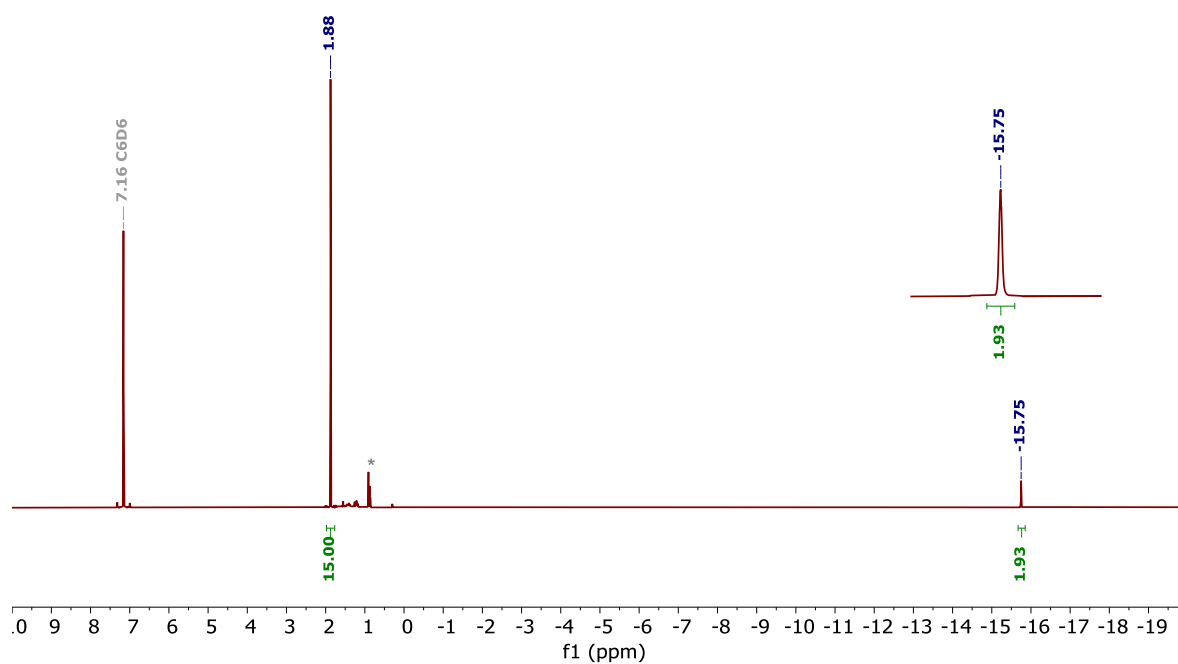

**Figure S11.**  $^1\text{H}$ -NMR spectrum (500 MHz,  $\text{C}_6\text{D}_6$ , 298 K) of compound **3**.

(\* = trace amounts of pentane)

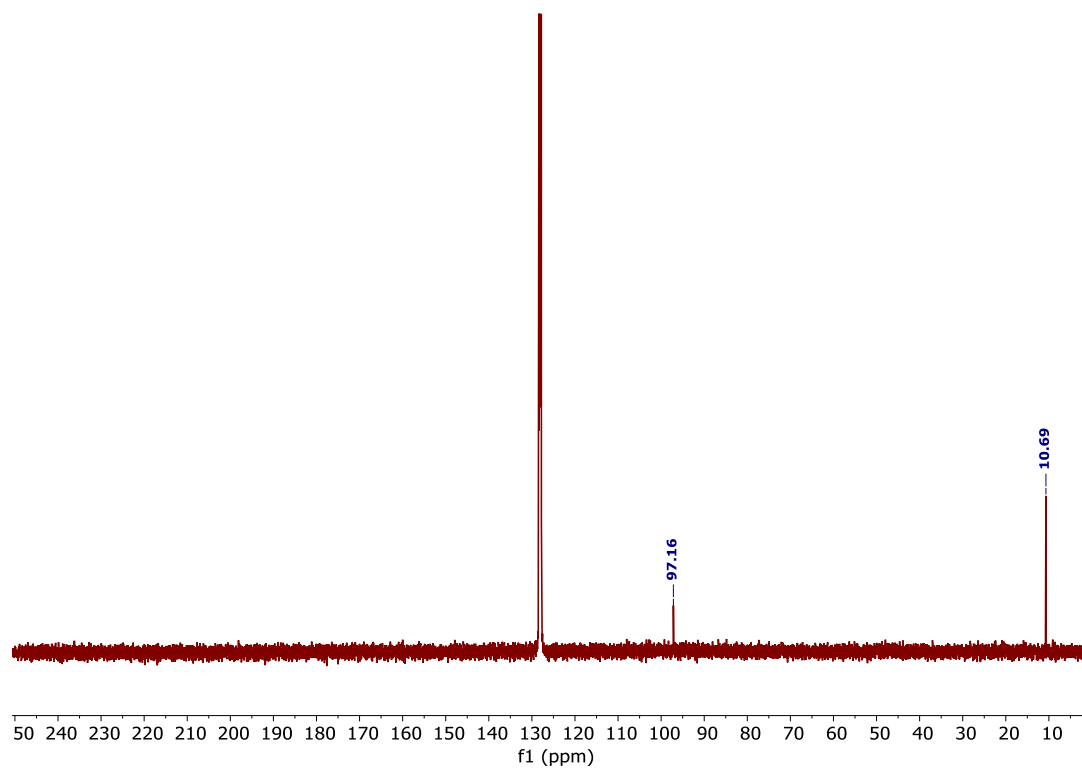

**Figure S12.**  $^{13}\text{C}\{^1\text{H}\}$ -NMR spectrum (126 MHz,  $\text{C}_6\text{D}_6$ , 298 K) of  $[\text{Cp}^*\text{Ir}(\text{CO})\text{H}_2]$ , **3**.

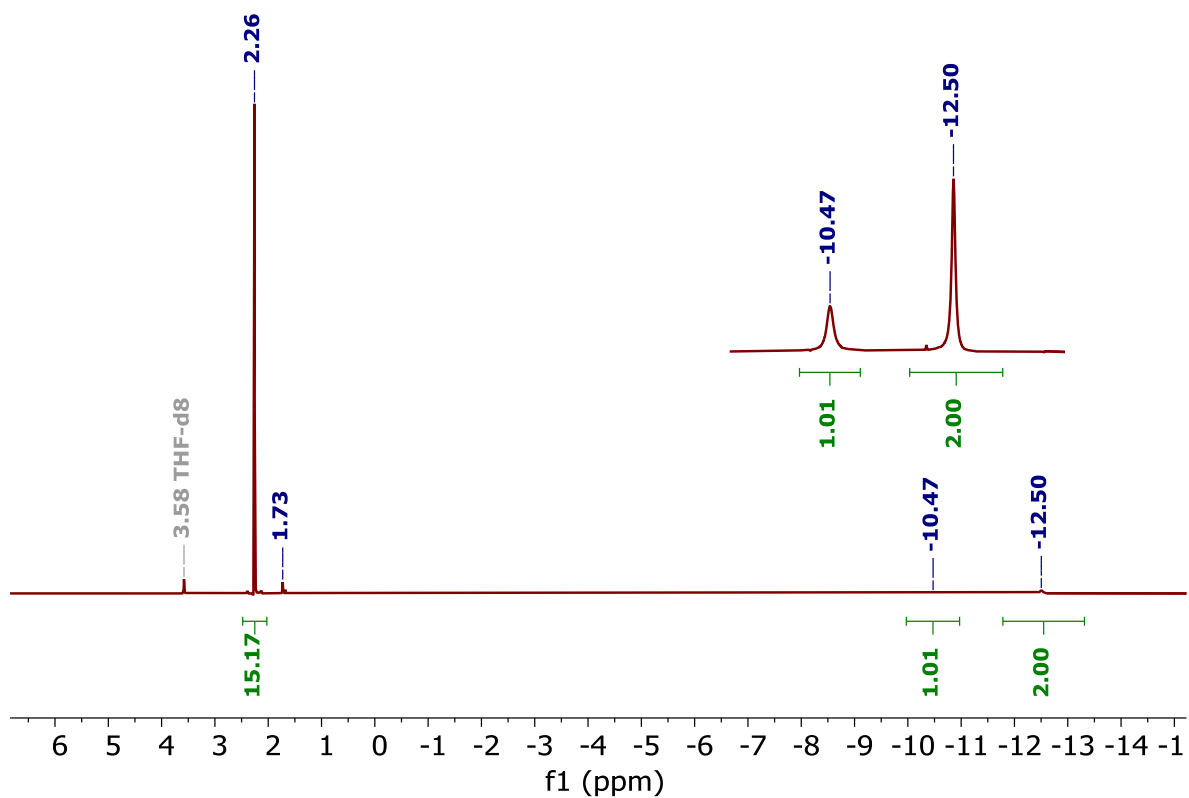

**Figure S13.**  $^1\text{H}$ -NMR spectrum (500 MHz, THF- $d_8$ , 298 K) of compound 4.

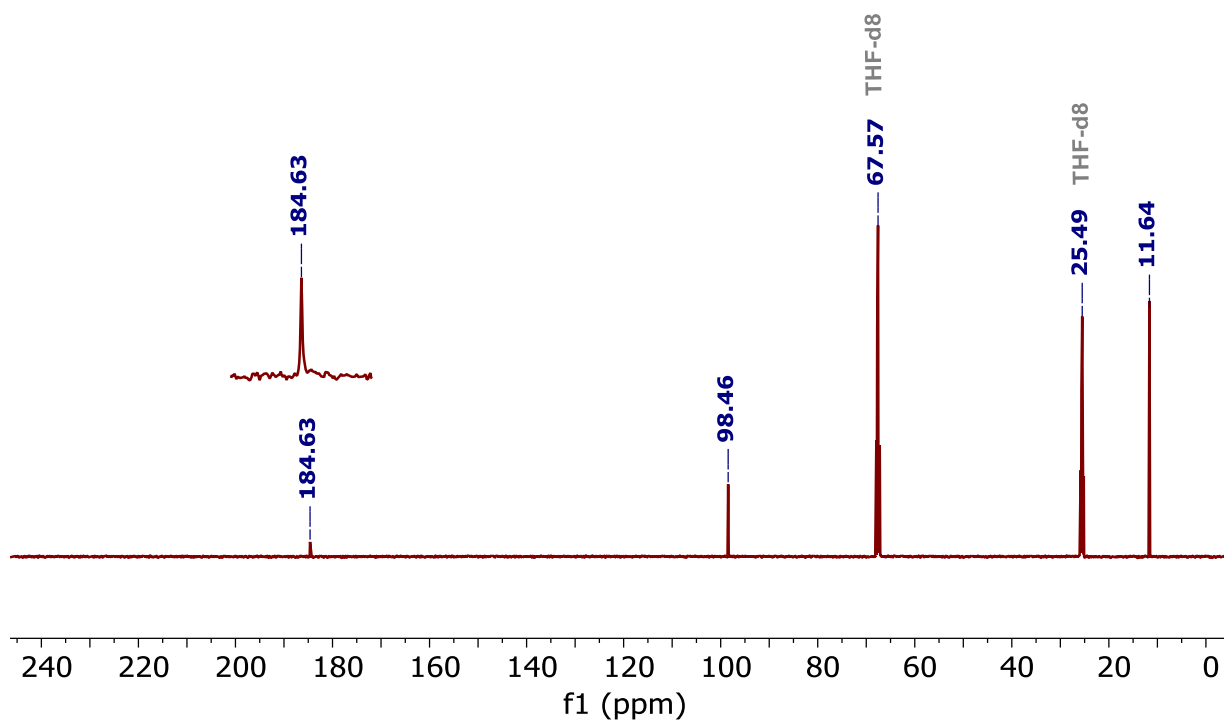

**Figure S14.**  $^{13}\text{C}\{^1\text{H}\}$ -NMR spectrum (126 MHz, THF- $d_8$ , 298 K) of compound 4.

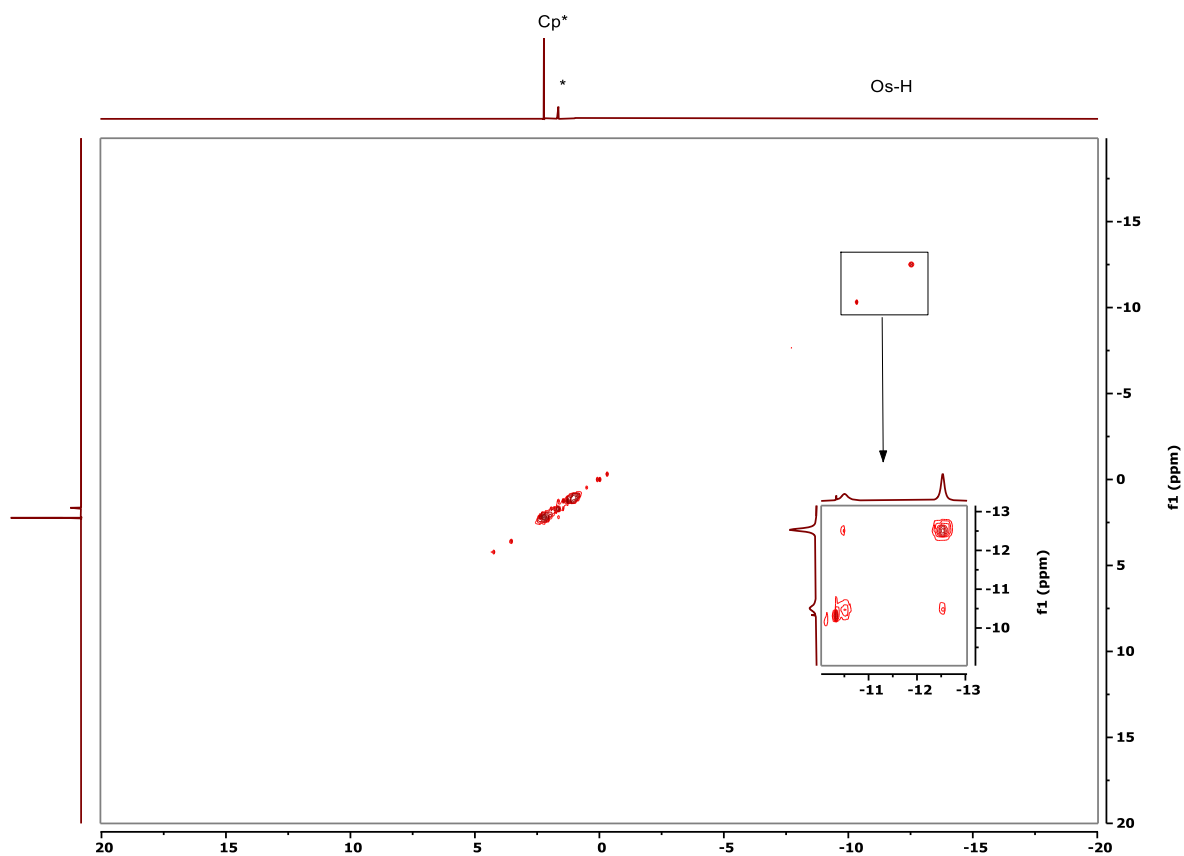

**Figure S15.**  $^1\text{H}$ - $^1\text{H}$  COSY NMR spectrum (400 MHz,  $\text{THF-d}_8$ , 302 K) of compound **4**, showing clear coupling of the two hydride signals. (\* = Impurity resulting from the decomposition of **4** in the timeframe of the experiment)

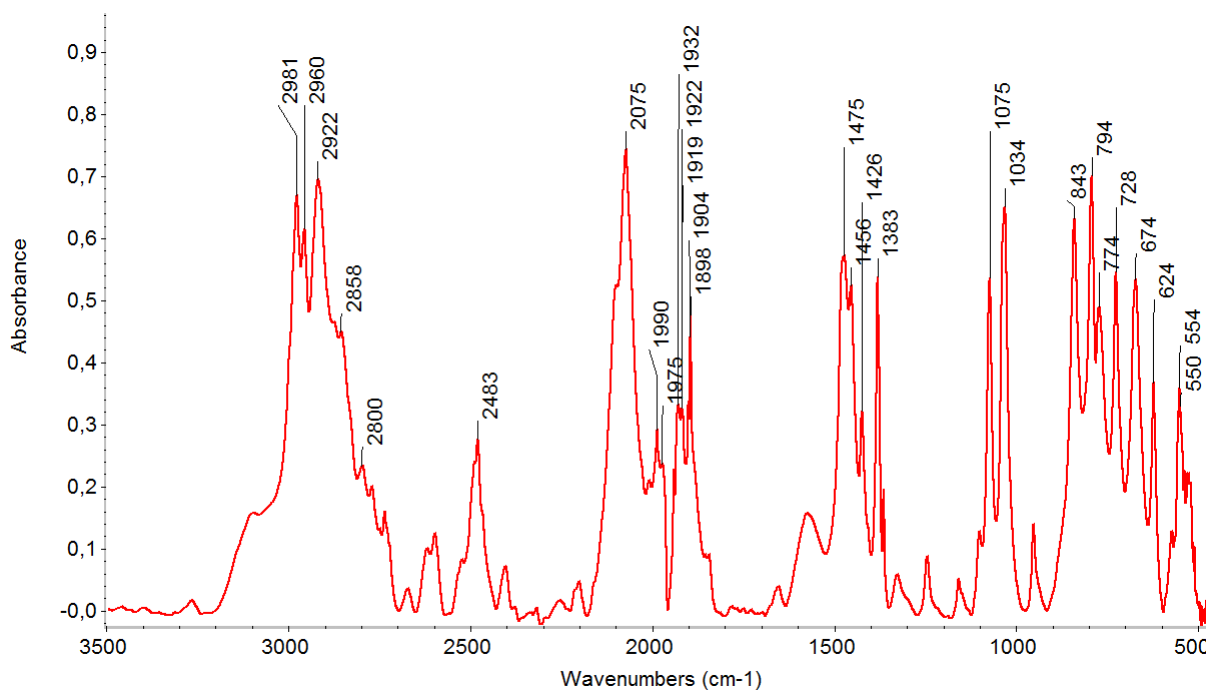

**Figure S16.** DRIFT (293 K,  $\text{cm}^{-1}$ ) spectrum of compound **4**.

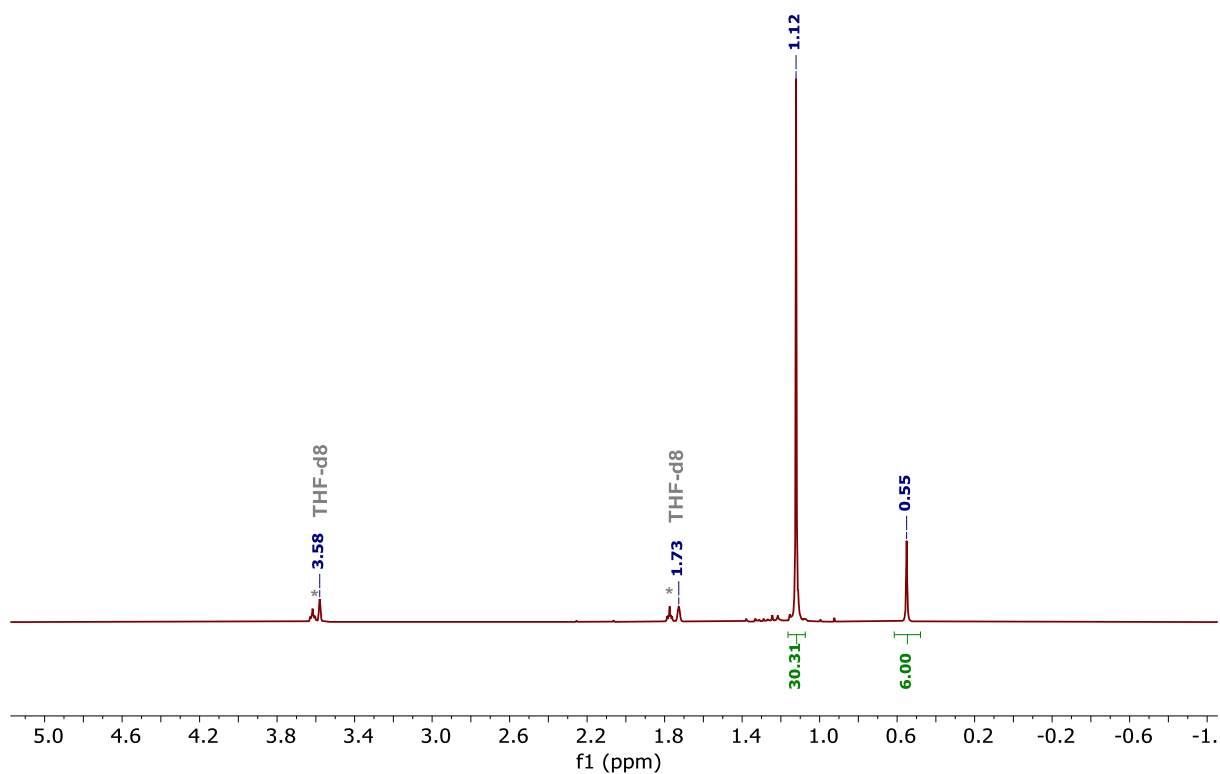

**Figure S17.**  $^1\text{H-NMR}$  spectrum (500 MHz,  $\text{THF-d}_8$ , 298 K) of compound **5**. (\* = THF)

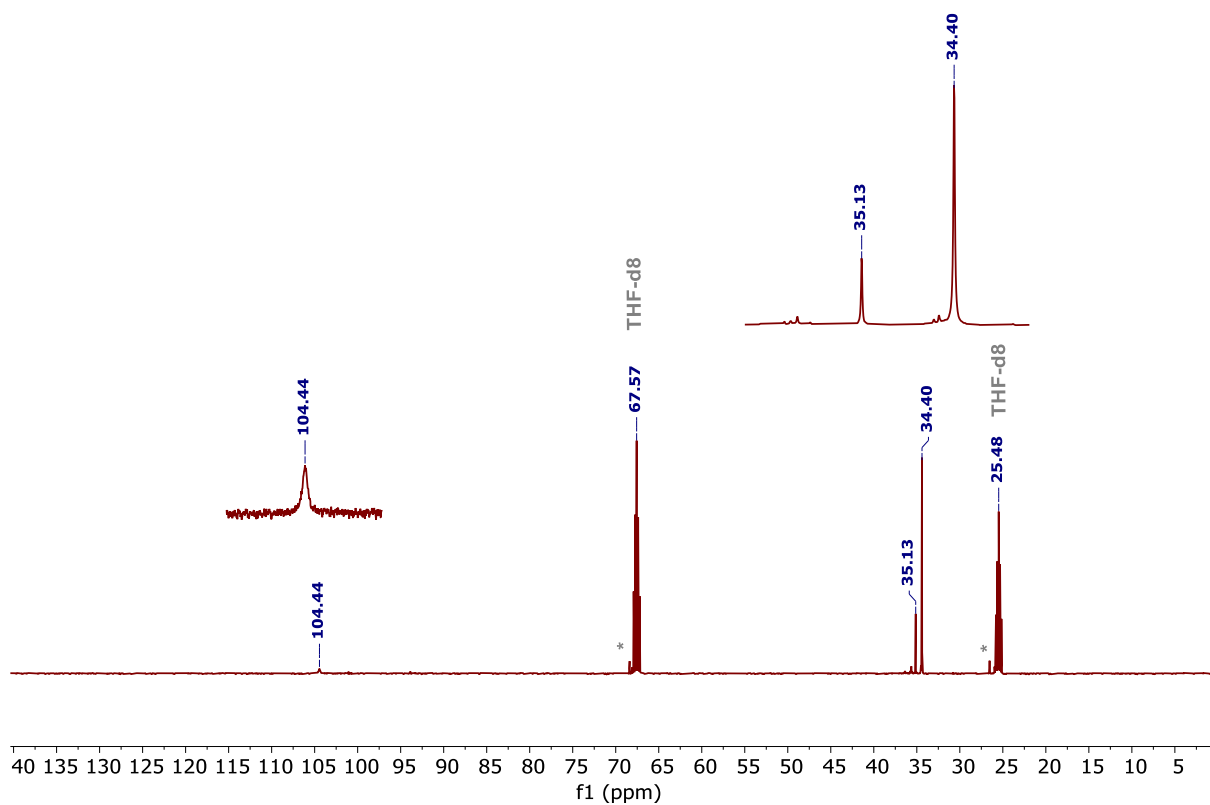

**Figure S18.**  $^{13}\text{C}\{^1\text{H}\}$ -NMR spectrum (126 MHz,  $\text{THF-d}_8$ , 298 K) of compound **5**. (\* = THF)

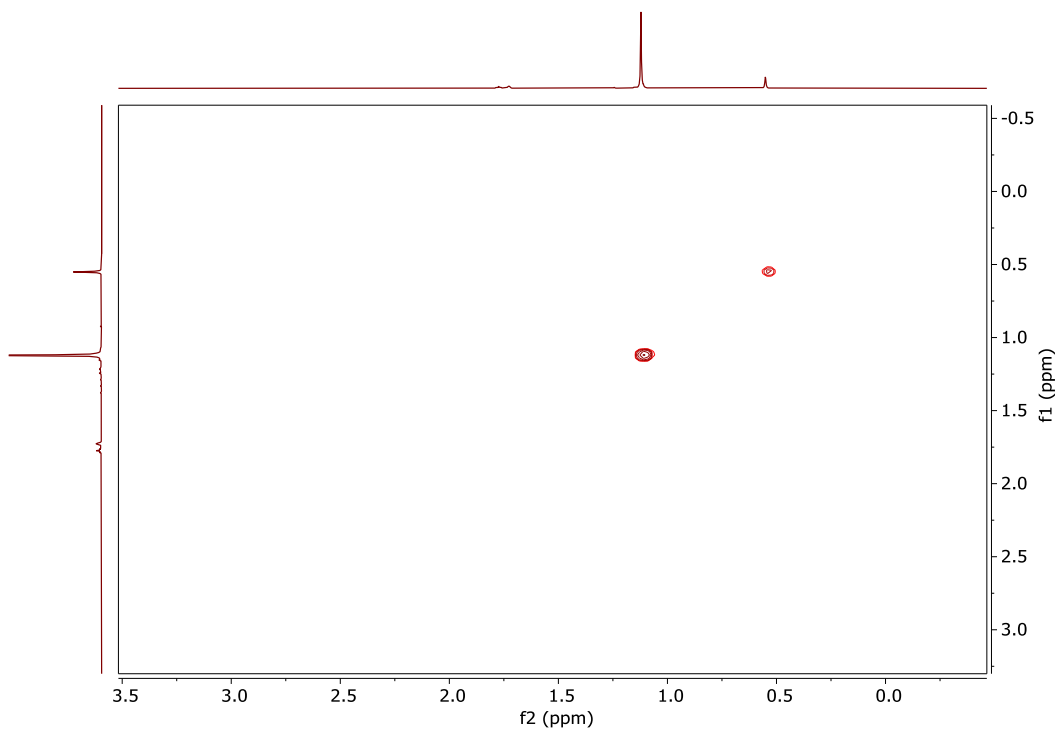

**Figure S19.**  $^1\text{H}$ - $^1\text{H}$  COSY NMR spectrum (500 MHz, THF- $d_8$ , 298 K) of compound **5**.

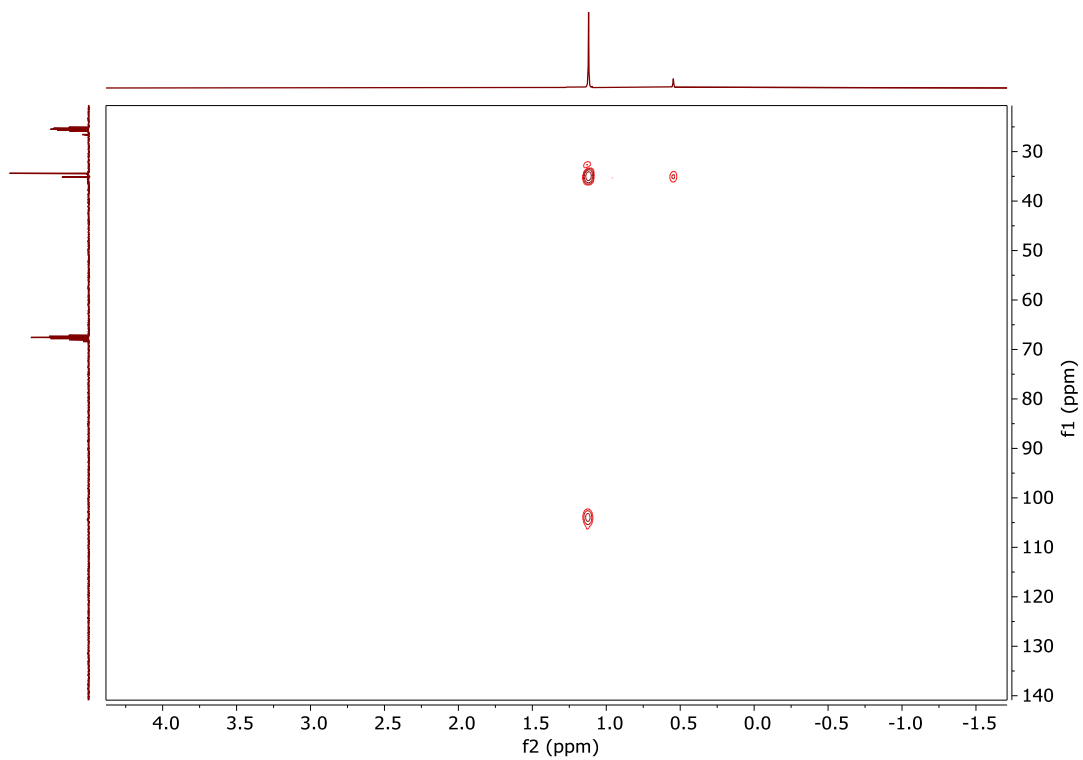

**Figure S20.**  $^1\text{H}$ - $^{13}\text{C}$  HSQC NMR spectrum (500 MHz, THF- $d_8$ , 298 K) of compound **5**.

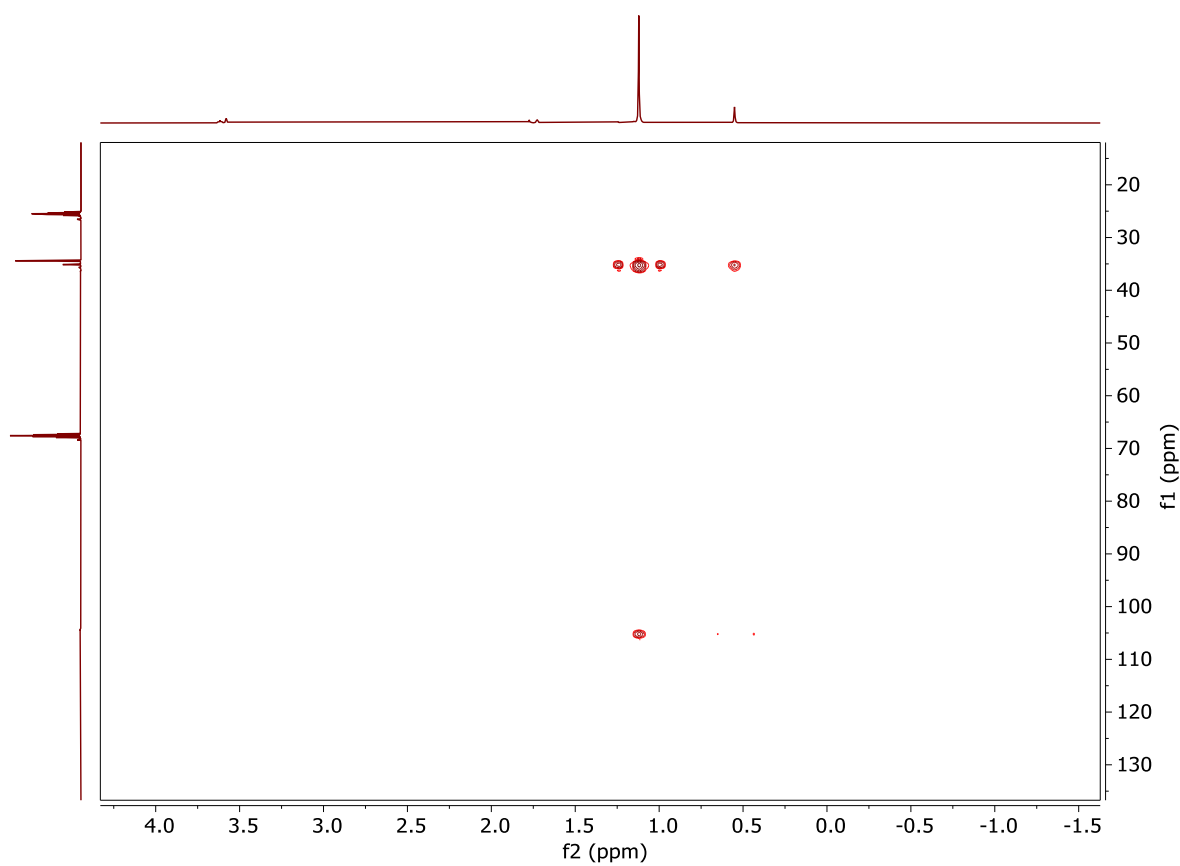

**Figure S21.**  $^1\text{H}$ - $^{13}\text{C}$  HMBC NMR spectrum (500 MHz,  $\text{THF-d}_8$ , 298 K) of compound **5**.

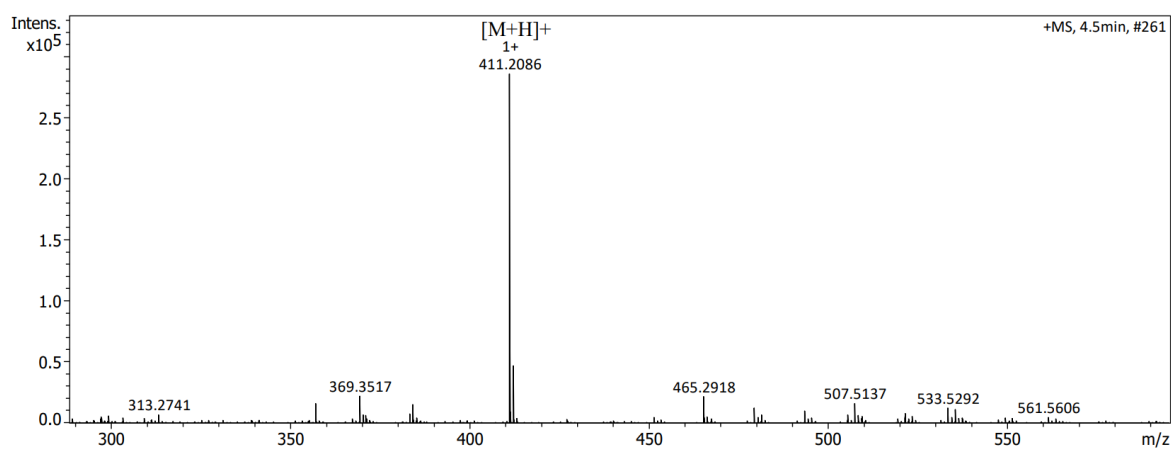

**Figure S22.** HRMS (APCI- $\text{SP}^+$ ) spectrum of complex  $[\text{Ta}(\text{O})(\text{CH}_2t\text{Bu})_3]_x$ , **5**.

## C. X-ray crystallography

Samples of single crystals for compound **1** were coated in Paratone-N oil for transport to the Advanced Light Source (ALS, Berkeley, CA, USA). Crystals were mounted on a MiTeGen 10  $\mu\text{m}$  aperture Dual-Thickness MicroMount loop. X-ray diffraction data was collected at the ALS, Lawrence Berkeley National Lab, Berkeley, CA, station 12.2.1 using a silicon monochromated beam of 17 keV ( $\lambda = 0.7288 \text{ \AA}$ ) synchrotron radiation. Data was collected at 100 K, with the crystals cooled by a stream of dry nitrogen. Bruker APEX3 software was used for the data collections, Bruker SAINT v8.37A or V8.38A software was used to conduct the cell refinement and data reduction procedures,<sup>7</sup> and absorption corrections were carried out by a multi-scan method utilizing the SADABS program.<sup>7</sup> Initial structure solutions were found using direct methods (SHELXT),<sup>8</sup> and refinements were carried out using SHELXL-2014,<sup>9</sup> as implemented by Olex2.<sup>10</sup> Thermal parameters for all non-hydrogen atoms were refined anisotropically. Hydrogen atoms were placed in calculated positions and refined isotropically. Thermal ellipsoid plots were made using Mercury.<sup>11</sup>

A suitable crystal of compound **2** was selected and mounted on a MiTeGen Dual-Thickness MicroMount loop coated in Fomblin oil. The X-ray diffraction data was collected at 100 K on a Rigaku-Oxford Diffraction XtaLAB Synergy diffractometer equipped with an HyPix-Arc 100 detector and a Molybdenum microsource ( $\lambda = 0.71073 \text{ \AA}$ ). Data collection, unit-cell refinement, data reduction and absorption correction<sup>12</sup> were carried out with the CrysAlisPro software.<sup>13</sup> The resulting set of *hkl* reflections were used to solve the structure with the ShelXT<sup>8</sup> structure solution program using the intrinsic phasing solution method and by using Olex2<sup>10</sup> as the graphical interface. Displacement parameters for all non-hydrogen atoms were refined anisotropically with version 2018/3 of ShelXL<sup>9</sup> using least-square minimization. Hydrogen atoms were placed geometrically and their position was refined using riding restraints.

CCDC 2351192 and 2351850 contain supplementary crystallographic data for this article. These data can be obtained free of charge from The Cambridge Crystallographic Data Centre via [www.ccdc.cam.ac.uk/structures](http://www.ccdc.cam.ac.uk/structures).



## D. Computational data

### Methods.

All DFT calculations were carried out with the Gaussian 09 suite of programs.<sup>[i]</sup> Geometries were fully optimized in gas phase without symmetry constraints, employing the B3PW91 functional.<sup>[ii]</sup> The nature of the extrema was verified by analytical frequency calculations. The calculation of electronic energies and enthalpies of the extrema of the potential energy surface (minima and transition states) were performed at the same level of theory as the geometry optimizations. IRC calculations were performed to confirm the connections of the optimized transition states. Iridium, Osmium, Rhenium and Tantalum atoms were treated with a small-core effective core potential (60 MWB), associated with its adapted basis set<sup>[iii]</sup> augmented with a polarization function ( $\zeta_f = 0.938, 0.886, 0.869$  and  $0.790$  respectively for Ir, Os, Re and Ta).<sup>[iv]</sup> For the other elements (H, C and O), Pople's double- $\zeta$  basis set 6-31G(d,p) was used.<sup>[v]</sup> The electronic charges (at the DFT level) were computed using the natural population analysis (NPA) technique.<sup>[vi]</sup>

[i] Gaussian 09, Revision D.01, M. J. Frisch, G. W. Trucks, H. B. Schlegel, G. E. Scuseria, M. A. Robb, J. R. Cheeseman, G. Scalmani, V. Barone, G. A. Petersson, H. Nakatsuji, X. Li, M. Caricato, A. Marenich, J. Bloino, B. G. Janesko, R. Gomperts, B. Mennucci, H. P. Hratchian, J. V. Ortiz, A. F. Izmaylov, J. L. Sonnenberg, D. Williams-Young, F. Ding, F. Lipparini, F. Egidi, J. Goings, B. Peng, A. Petrone, T. Henderson, D. Ranasinghe, V. G. Zakrzewski, J. Gao, N. Rega, G. Zheng, W. Liang, M. Hada, M. Ehara, K. Toyota, R. Fukuda, J. Hasegawa, M. Ishida, T. Nakajima, Y. Honda, O. Kitao, H. Nakai, T. Vreven, K. Throssell, J. A. Montgomery, Jr., J. E. Peralta, F. Ogliaro, M. Bearpark, J. J. Heyd, E. Brothers, K. N. Kudin, V. N. Staroverov, T. Keith, R. Kobayashi, J. Normand, K. Raghavachari, A. Rendell, J. C. Burant, S. S. Iyengar, J. Tomasi, M. Cossi, J. M. Millam, M. Klene, C. Adamo, R. Cammi, J. W. Ochterski, R. L. Martin, K. Morokuma, O. Farkas, J. B. Foresman, and D. J. Fox, Gaussian, Inc., Wallingford CT, 2016.

[ii] (a) A. D. Becke, *J. Chem. Phys.* 1993, 98, 5648-5652 ; (b) J. P. Perdew, J. A. Chevary, S. H. Vosko, K. A. Jackson, M. R. Pederson, D. J. Singh, C. Fiolhais, *Phys. Rev. B* 1992, 46, 6671-6687.

[iii] (a) D. Andrae, U. Häussermann, M. Dolg, H. Stoll, H. Preuss, *Theoretica chimica acta* 1990, 77, 123-141 ; (b) X. Cao and M. Dolg, *Journal of Molecular Structure: THEOCHEM*, 2004, 673, 203–209 ; (c) X. Cao, M. Dolg and H. Stoll, *J. Chem. Phys.*, 2003, 118, 487–496.

[iv] A. W. Ehlers, M. Böhme, S. Dapprich, A. Gobbi, A. Höllwarth, V. Jonas, K. F. Köhler, R. Stegmann, A. Veldkamp and G. Frenking, *Chemical Physics Letters*, 1993, 208, 111–114.

[v] (a) J. A. Pople, *J. Chem. Phys.* 1971, 54, 724-728 ; (b) W. J. Hehre, R. Ditchfield, J. A. Pople, *J. Chem. Phys.* 1972, 56, 2257-2261 ; (c) P. C. Hariharan, J. A. Pople, *Theor. Chim. Acta* 1973, 28, 213-222 ; (d) M. M. Francl, W. J. Pietro, W. J. Hehre, J. S. Binkley, M. S. Gordon, D. J. DeFrees, J. A. Pople, *J. Chem. Phys.* 1982, 77, 3654-3665.

[vi] A. E. Reed, L. A. Curtiss, *Chem. Rev.* 1988, 88, 899 – 926.

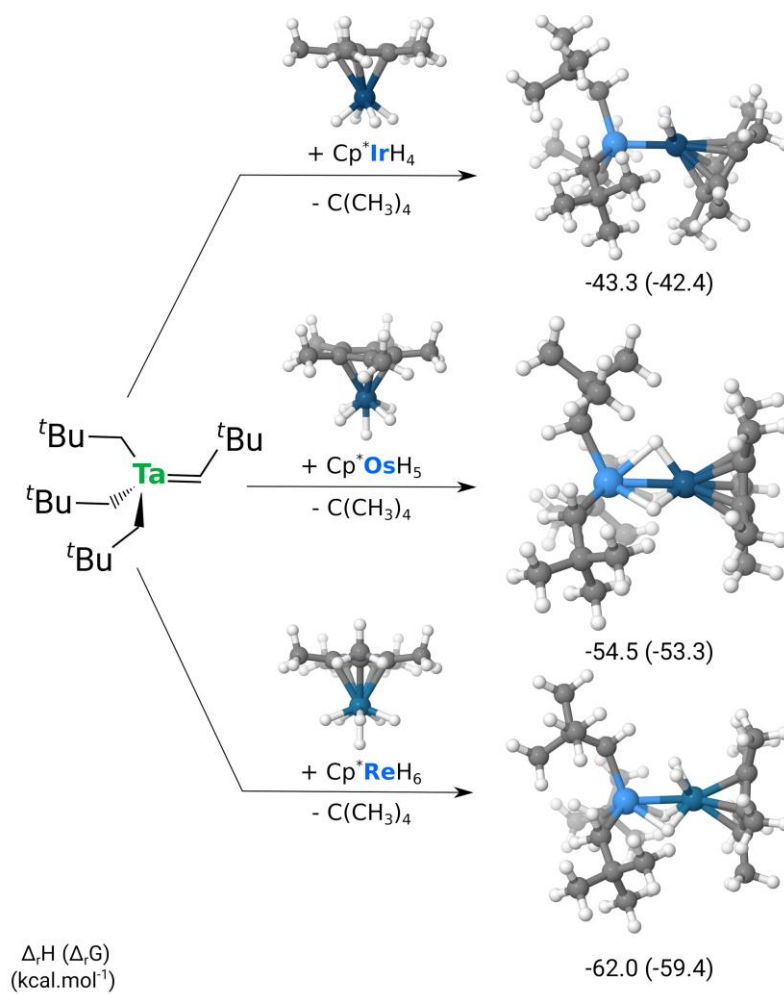

**Figure S-DFT.1.** Calculated enthalpy energy (Gibbs free energy) of the formation of Ta(CH<sub>2</sub>*t*Bu)<sub>3</sub>IrH<sub>2</sub>Cp\*, Ta(CH<sub>2</sub>*t*Bu)<sub>3</sub>(μ-H)<sub>3</sub>OsCp\* and Ta(CH<sub>2</sub>*t*Bu)<sub>3</sub>(μ-H)<sub>2</sub>Re(η-H)<sub>2</sub>Cp\*. The energies are given in kcal/mol.

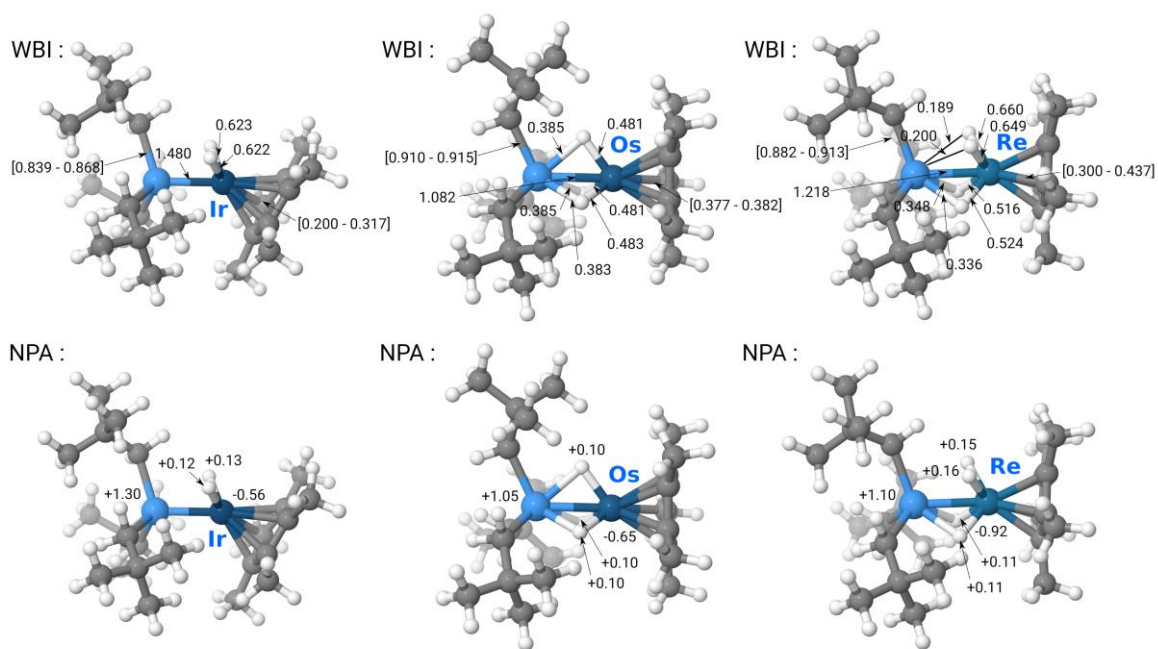

**Figure S-DFT.2** Wiberg Bond Indexes and Natural Charges for  $\text{Ta}(\text{CH}_2t\text{Bu})_3\text{IrH}_2\text{Cp}^*$ ,  $\text{Ta}(\text{CH}_2t\text{Bu})_3(\mu\text{-H})_3\text{OsCp}^*$  and  $\text{Ta}(\text{CH}_2t\text{Bu})_3(\mu\text{-H})_2\text{Re}(\eta\text{-H})_2\text{Cp}^*$ .

**Table S-DFT.1** NBO Analysis of Ta(CH<sub>2</sub>*t*Bu)<sub>3</sub>IrH<sub>2</sub>Cp\*, Ta(CH<sub>2</sub>*t*Bu)<sub>3</sub>(μ-H)<sub>3</sub>OsCp\* and Ta(CH<sub>2</sub>*t*Bu)<sub>3</sub>(μ-H)<sub>2</sub>Re(η-H)<sub>2</sub>Cp\*.

| <b>Bonding</b>                                                     |                          |   |     |                           |        |        |        |
|--------------------------------------------------------------------|--------------------------|---|-----|---------------------------|--------|--------|--------|
| (1.84086) BD Ta - Ir                                               |                          |   |     |                           |        |        |        |
| (39.02%) Ta 2 s(27.03%) p 0.15(4.16%) d 2.54(68.74%) f 0.00(0.06%) |                          |   |     |                           |        |        |        |
| (60.98%) Ir 4 s(30.11%) p 0.26(7.69%) d 2.07(62.19%) f 0.00(0.01%) |                          |   |     |                           |        |        |        |
| <b>2nd order pertubation analysis</b>                              |                          |   |     |                           | M = Ir | M = Os | M = Re |
| BD                                                                 | C <sub>CH2-neo</sub> -Ta | → | LP* | M                         | ~404   | ~101   | ~501   |
| BD                                                                 | C <sub>CH2-neo</sub> -Ta | → | BD* | Ta - M                    | ~265   | -      | -      |
| BD                                                                 | C <sub>CH2-neo</sub> -Ta | → | BD* | M - H                     | ~405   | ~70    | ~205   |
| BD                                                                 | C <sub>CH2-neo</sub> -Ta | → | BD* | M - C <sub>Cp*</sub>      | -      | ~80    | ~49    |
| BD                                                                 | M - C <sub>Cp*</sub>     | → | BD* | Ta                        | -      | ~1621  | -      |
| BD                                                                 | M - C <sub>Cp*</sub>     | → | BD* | Ta - C <sub>CH2-neo</sub> | -      | ~4070  | ~80    |
| BD                                                                 | Ta - M                   | → | LP* | Ta                        | ~2071  | -      | -      |
| BD                                                                 | Ta - M                   | → | LP* | M                         | ~295   | -      | -      |
| BD                                                                 | Ta - M                   | → | BD* | C <sub>CH2-neo</sub> -Ta  | ~80    | -      | -      |
| BD                                                                 | Ta - M                   | → | BD* | C <sub>CH2-neo</sub> -H   | ~4     | -      | -      |
| BD                                                                 | Ta - M                   | → | BD* | M - H                     | ~510   | -      | -      |
| BD                                                                 | M - H                    | → | LP* | Ta                        | ~9637  | ~6000  | ~6400  |
| BD                                                                 | M - H                    | → | BD* | C <sub>CH2-neo</sub> -Ta  | ~1800  | -      | -      |
| BD                                                                 | M - H                    | → | BD* | Ta - M                    | ~1950  | -      | -      |
| CR                                                                 | Ta                       | → | LP* | M                         | ~286   | ~201   | ~225   |
| CR                                                                 | Ta                       | → | BD* | Ta - M                    | ~265   | -      | -      |
| CR                                                                 | Ta                       | → | BD* | M - H                     | ~130   | ~260   | ~240   |
| CR                                                                 | Ta                       | → | BD* | M - C <sub>Cp*</sub>      | -      | ~120   | ~2     |
| CR                                                                 | M                        | → | LP* | Ta                        | ~513   | ~665   | ~1110  |
| CR                                                                 | M                        | → | BD* | C <sub>CH2-neo</sub> -Ta  | ~50    | ~75    | ~116   |
| CR                                                                 | M                        | → | BD* | Ta - M                    | ~214   | -      | -      |
| LP                                                                 | M                        |   | LP* | Ta                        | ~26    | ~488   | ~1475  |
| LP                                                                 | M                        |   | BD* | C <sub>CH2-neo</sub> -Ta  | ~10    | ~796   | ~1285  |

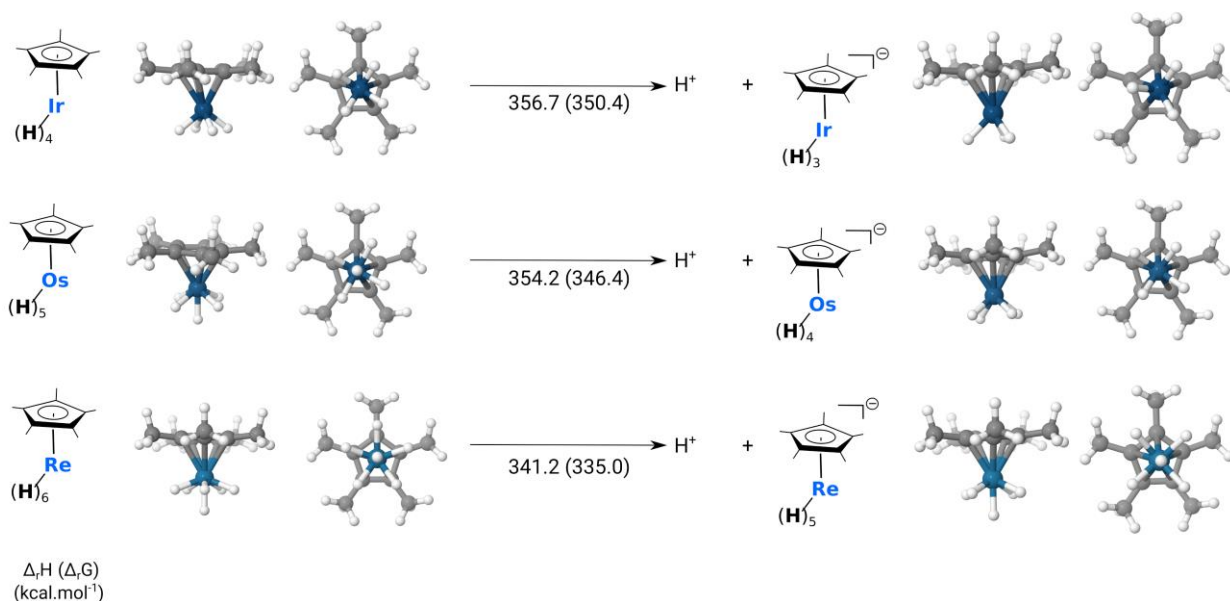

**Figure S-DFT.3** Calculated enthalpy energy (*Gibbs-free* energy) for the Cp\*IrH<sub>4</sub>, Cp\*OsH<sub>5</sub> and Cp\*ReH<sub>6</sub> deprotonation. The energies are given in kcal/mol.

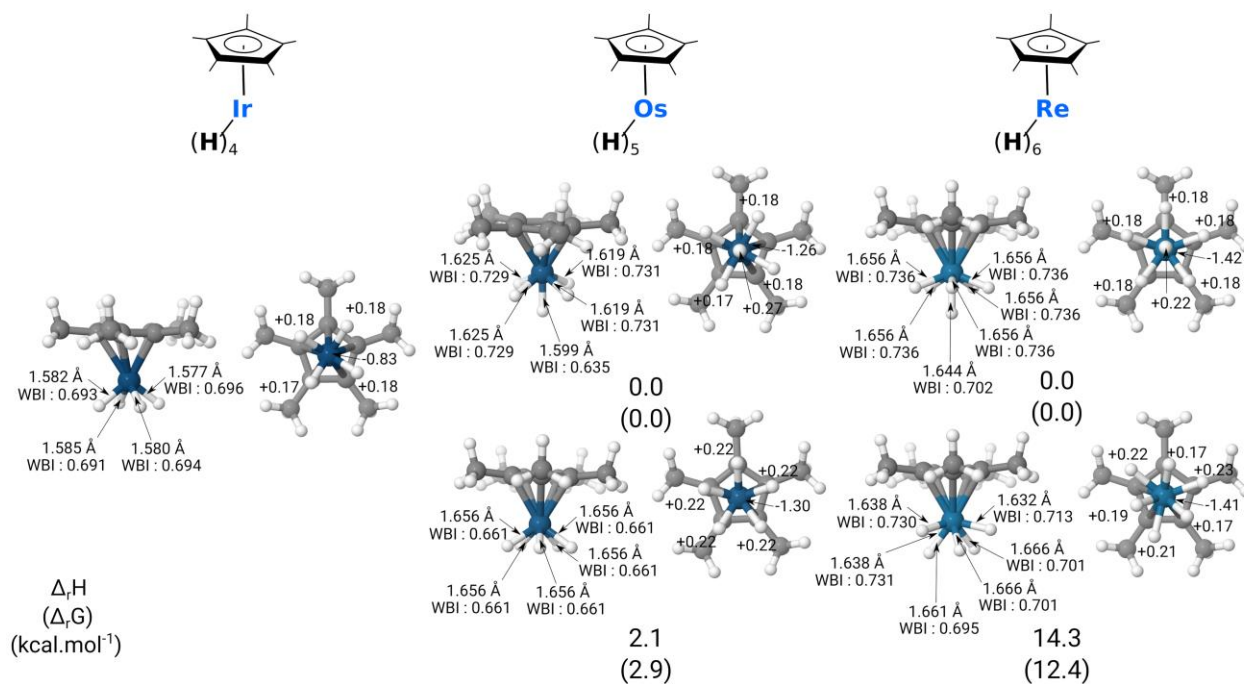

**Figure S-DFT.4** Wiberg Bond Indexes and Natural Charges for Cp\*IrH<sub>4</sub>, Cp\*OsH<sub>5</sub> and Cp\*ReH<sub>6</sub> and relative stability of the different isomers of Cp\*OsH<sub>5</sub> and Cp\*ReH<sub>6</sub>. The energies are given in kcal/mol.

## Discussion regarding the lack of reactivity between Cp\*ReH<sub>6</sub> and Ta(CH*t*Bu)(CH<sub>2</sub>*t*Bu)<sub>3</sub>

According to the DFT calculations, the formation of the Ta/Re analogue should be thermodynamically favorable (see Figure DFT SI.1). The formation of this complex would even be the most favorable of the three. The bonding within the Ta/Re and the Ta/Os complexes is also similar both regarding the Wiberg Bond Indexes (see Figure S-DFT.2) and the second-order perturbation natural bond order (NBO) analysis (see Table S-DFT.1). Therefore, the observed lack of reactivity is surprising.

To assess if the reactivity difference is due to the precursors, we studied the deprotonation reaction of Cp\*IrH<sub>4</sub>, Cp\*OsH<sub>5</sub> and Cp\*ReH<sub>6</sub> (see Figure S-DFT.3) and obtained similar energy values (enthalpy and/or *Gibbs-free* energy) for the three complexes. However, it is interesting to note that for Cp\*OsH<sub>5</sub> and Cp\*ReH<sub>6</sub> two isomers were obtained (see Figure S-DFT.4). In both cases, the pseudo-C<sub>4v</sub> or -C<sub>5v</sub> isomers with four or five equatorial hydrides and one axial hydride are the most stable ones for Cp\*OsH<sub>5</sub> and Cp\*ReH<sub>6</sub> respectively. For Cp\*OsH<sub>5</sub>, although less stable, the C<sub>5v</sub> “piano stool” isomer, less sterically hindered, is close in energy ( $\Delta H = 2.1$  kcal/mol) and could easily be formed to allow the interaction with the Ta complex. For Cp\*ReH<sub>6</sub>, the stability difference between both isomers is higher ( $\Delta H = 14.3$  kcal/mol) which could indicate that this complex is less fluxional and therefore less likely to react with the Ta complex due to the lack of a coordination site.

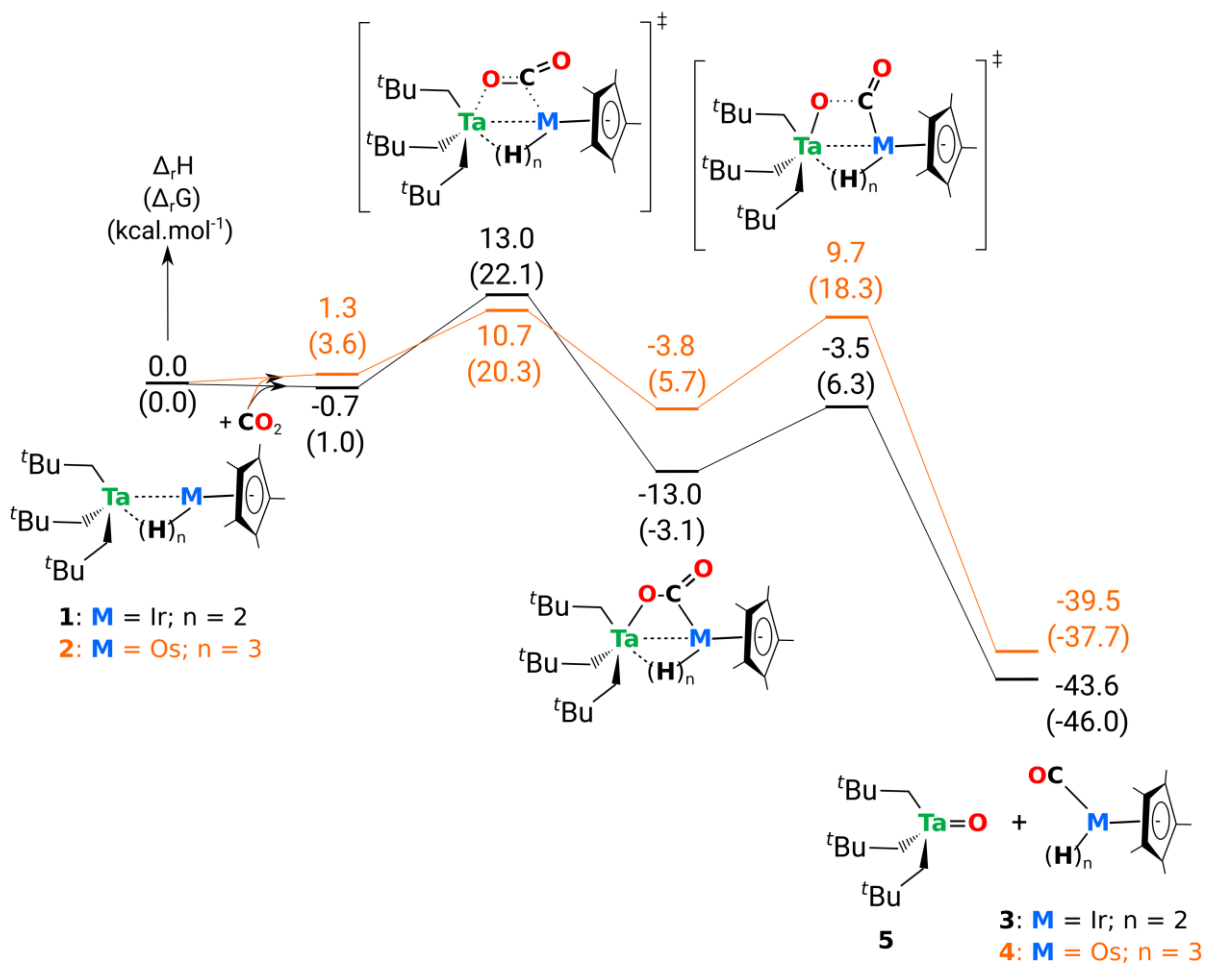

**Figure DFT SI.5** - Computed reaction pathway for the reaction of CO<sub>2</sub> with Ta(CH<sub>2</sub>*t*Bu)<sub>3</sub>IrH<sub>2</sub>Cp\* and Ta(CH<sub>2</sub>*t*Bu)<sub>3</sub>(μ-H)<sub>3</sub>OsCp\* at room temperature. The energies are given in kcal/mol.

Cartesian Coordinates :

17

C(CH<sub>3</sub>)<sub>4</sub>

|   |          |          |          |
|---|----------|----------|----------|
| C | -0.00009 | -0.00000 | -0.00031 |
| C | -0.00026 | 0.00000  | 1.53482  |
| C | 1.44766  | -0.00000 | -0.51137 |
| C | -0.72376 | -1.25352 | -0.51180 |
| C | -0.72376 | 1.25352  | -0.51180 |
| H | -0.74119 | 1.28121  | -1.60745 |
| H | -1.76176 | 1.28175  | -0.16055 |
| H | -0.22800 | 2.16652  | -0.16231 |
| H | 1.48075  | 0.00000  | -1.60704 |
| H | 1.99091  | 0.88523  | -0.16081 |
| H | 1.99091  | -0.88523 | -0.16081 |
| H | -0.74119 | -1.28121 | -1.60745 |
| H | -0.22800 | -2.16652 | -0.16231 |
| H | -1.76176 | -1.28175 | -0.16055 |
| H | -1.02270 | 0.00000  | 1.92994  |
| H | 0.51113  | -0.88537 | 1.92991  |
| H | 0.51113  | 0.88537  | 1.92991  |

3

CO<sub>2</sub>

|   |          |          |          |
|---|----------|----------|----------|
| C | -0.26743 | -2.29440 | -0.31006 |
| O | 0.84053  | -2.13018 | -0.56225 |
| O | -1.37540 | -2.45840 | -0.05771 |

64

Ta(CH<sub>t</sub>Bu)(CH<sub>2t</sub>Bu)<sub>3</sub>

|    |          |         |           |
|----|----------|---------|-----------|
| C  | 1.54007  | 6.80730 | -9.25112  |
| Ta | -0.37778 | 6.32889 | -10.13378 |
| C  | -0.07018 | 6.31711 | -12.27971 |
| C  | -1.96878 | 7.60874 | -9.36277  |
| H  | -2.60414 | 7.14190 | -8.59881  |
| H  | -2.56576 | 7.53378 | -10.30248 |
| C  | -1.78442 | 9.10582 | -9.01291  |
| C  | 2.57561  | 5.97841 | -8.46630  |
| H  | 1.23277  | 7.67279 | -8.62458  |
| H  | 2.05388  | 7.28491 | -10.11320 |
| H  | 0.75015  | 7.05457 | -12.39479 |
| C  | -1.06340 | 6.49437 | -13.44966 |
| H  | 0.43209  | 5.33362 | -12.37872 |
| C  | 3.79732  | 6.85688 | -8.13999  |
| C  | 3.03456  | 4.78646 | -9.31588  |
| C  | 1.96736  | 5.47344 | -7.15200  |



|   |          |          |           |
|---|----------|----------|-----------|
| C | -2.21073 | 5.48060  | -13.33630 |
| C | -0.32698 | 6.26515  | -14.78214 |
| C | -1.64282 | 7.91574  | -13.45265 |
| H | 2.70022  | 4.89063  | -6.58157  |
| H | 1.09838  | 4.83621  | -7.34058  |
| H | 1.64578  | 6.31036  | -6.51977  |
| H | 4.55503  | 6.29210  | -7.58320  |
| H | 3.51133  | 7.72219  | -7.53053  |
| H | 4.26887  | 7.23350  | -9.05539  |
| H | 2.18443  | 4.14228  | -9.56094  |
| H | 3.78266  | 4.18668  | -8.78397  |
| H | 3.48732  | 5.12452  | -10.25631 |
| H | -2.91187 | 5.58765  | -14.17275 |
| H | -2.77232 | 5.61486  | -12.40492 |
| H | -1.83120 | 4.45324  | -13.34976 |
| H | 0.49673  | 6.97781  | -14.90474 |
| H | -1.00468 | 6.38574  | -15.63610 |
| H | 0.09567  | 5.25516  | -14.82943 |
| H | -2.30033 | 8.06672  | -14.31665 |
| H | -0.84735 | 8.66846  | -13.50487 |
| H | -2.23501 | 8.10991  | -12.55176 |
| C | -3.14382 | 9.82171  | -9.10783  |
| C | -0.80336 | 9.78807  | -9.97947  |
| C | -1.26337 | 9.23936  | -7.57470  |
| H | 0.20552  | 9.36172  | -9.90664  |
| H | -0.71160 | 10.85766 | -9.75702  |
| H | -1.13872 | 9.69644  | -11.01856 |
| H | -3.05752 | 10.87900 | -8.82801  |
| H | -3.87847 | 9.35651  | -8.44120  |
| H | -3.54273 | 9.77717  | -10.12786 |
| H | -1.13961 | 10.29323 | -7.29963  |
| H | -0.29409 | 8.74573  | -7.44662  |
| H | -1.96267 | 8.78743  | -6.86206  |
| C | -0.83392 | 4.56065  | -9.59155  |
| H | -1.19800 | 5.04569  | -8.63822  |
| C | -1.08084 | 3.07222  | -9.64122  |
| C | -2.59850 | 2.80493  | -9.68558  |
| C | -0.48917 | 2.38477  | -8.39645  |
| C | -0.42768 | 2.48167  | -10.90023 |
| H | -0.60343 | 1.40106  | -10.95536 |
| H | 0.65437  | 2.64992  | -10.89767 |
| H | -0.84014 | 2.93901  | -11.80486 |
| H | 0.59257  | 2.53856  | -8.33890  |

|   |          |         |           |
|---|----------|---------|-----------|
| H | -0.67899 | 1.30480 | -8.42371  |
| H | -0.93662 | 2.77990 | -7.47732  |
| H | -2.80295 | 1.72763 | -9.72442  |
| H | -3.04951 | 3.27287 | -10.56585 |
| H | -3.09508 | 3.20931 | -8.79646  |

30

IrCp\*H4

|    |           |          |           |
|----|-----------|----------|-----------|
| Ir | -7.07526  | 2.85516  | -7.52772  |
| C  | -7.37592  | 1.10550  | -8.91313  |
| C  | -8.54617  | 1.17841  | -8.07524  |
| C  | -8.13761  | 0.96179  | -6.71647  |
| C  | -6.71581  | 0.75769  | -6.70240  |
| C  | -6.23761  | 0.84395  | -8.06120  |
| C  | -9.95865  | 1.32714  | -8.55113  |
| C  | -9.04892  | 0.86362  | -5.53204  |
| C  | -5.89687  | 0.37940  | -5.50639  |
| C  | -4.84567  | 0.53740  | -8.52407  |
| C  | -7.36723  | 1.12886  | -10.41136 |
| H  | -4.10242  | 0.83099  | -7.77914  |
| H  | -4.60814  | 1.06642  | -9.44984  |
| H  | -4.72554  | -0.53732 | -8.71218  |
| H  | -6.41443  | 1.49648  | -10.79892 |
| H  | -7.52843  | 0.12196  | -10.81751 |
| H  | -8.15329  | 1.77746  | -10.80511 |
| H  | -10.40714 | 0.34349  | -8.74086  |
| H  | -10.01007 | 1.90045  | -9.47938  |
| H  | -10.57978 | 1.83874  | -7.81226  |
| H  | -9.93030  | 1.49801  | -5.64986  |
| H  | -8.54420  | 1.16605  | -4.61175  |
| H  | -9.39626  | -0.16894 | -5.39832  |
| H  | -5.89698  | -0.70927 | -5.36656  |
| H  | -4.85868  | 0.70074  | -5.61557  |
| H  | -6.28793  | 0.83230  | -4.59232  |
| H  | -7.94152  | 4.03319  | -8.13033  |
| H  | -7.60641  | 3.83830  | -6.40417  |
| H  | -6.21754  | 3.76761  | -8.48589  |
| H  | -5.89413  | 3.55634  | -6.74696  |

29

IrCp\*H3 -

|    |          |         |          |
|----|----------|---------|----------|
| Ir | -7.07375 | 2.83918 | -7.59210 |
| C  | -7.37035 | 1.04394 | -8.95770 |
| C  | -8.52370 | 1.18437 | -8.11966 |
| C  | -8.12537 | 0.99570 | -6.74394 |

|   |           |          |           |
|---|-----------|----------|-----------|
| C | -6.69955  | 0.77789  | -6.74641  |
| C | -6.22890  | 0.78650  | -8.10100  |
| C | -9.93615  | 1.35636  | -8.59206  |
| C | -9.04073  | 0.87719  | -5.56458  |
| C | -5.87427  | 0.45218  | -5.53768  |
| C | -4.84799  | 0.43996  | -8.56724  |
| C | -7.35822  | 1.01823  | -10.45575 |
| H | -4.09921  | 0.69105  | -7.80973  |
| H | -4.58520  | 0.99553  | -9.47297  |
| H | -4.74037  | -0.63392 | -8.79627  |
| H | -6.42388  | 1.42919  | -10.85070 |
| H | -7.46556  | -0.00378 | -10.85611 |
| H | -8.17271  | 1.62143  | -10.86812 |
| H | -10.44382 | 0.38853  | -8.73050  |
| H | -9.97132  | 1.89101  | -9.54571  |
| H | -10.52159 | 1.93911  | -7.87466  |
| H | -9.92382  | 1.51316  | -5.68218  |
| H | -8.54254  | 1.19218  | -4.64232  |
| H | -9.39856  | -0.15557 | -5.40823  |
| H | -5.87469  | -0.62749 | -5.31975  |
| H | -4.83521  | 0.76536  | -5.67424  |
| H | -6.25334  | 0.97079  | -4.65214  |
| H | -8.03212  | 4.11390  | -7.59263  |
| H | -6.24595  | 3.87769  | -8.47347  |
| H | -6.39991  | 3.75642  | -6.47482  |

31

OsCp\*H5

|    |           |          |           |
|----|-----------|----------|-----------|
| Os | -7.16759  | 2.85552  | -7.50676  |
| C  | -7.42094  | 1.11638  | -8.90894  |
| C  | -8.59615  | 1.12684  | -8.07932  |
| C  | -8.18990  | 0.93195  | -6.72078  |
| C  | -6.75837  | 0.79799  | -6.69106  |
| C  | -6.27251  | 0.90623  | -8.05126  |
| C  | -10.00986 | 1.22537  | -8.56244  |
| C  | -9.10746  | 0.79101  | -5.54600  |
| C  | -5.93954  | 0.43976  | -5.48880  |
| C  | -4.87004  | 0.64432  | -8.50888  |
| C  | -7.40900  | 1.14229  | -10.40690 |
| H  | -4.14217  | 0.94983  | -7.75420  |
| H  | -4.64177  | 1.19551  | -9.42360  |
| H  | -4.72072  | -0.42415 | -8.71082  |
| H  | -6.46208  | 1.52755  | -10.79022 |
| H  | -7.55063  | 0.13145  | -10.81032 |

|   |           |          |           |
|---|-----------|----------|-----------|
| H | -8.20531  | 1.77703  | -10.80192 |
| H | -10.41783 | 0.22369  | -8.74814  |
| H | -10.07507 | 1.79195  | -9.49339  |
| H | -10.65099 | 1.71792  | -7.82836  |
| H | -10.00811 | 1.39688  | -5.66520  |
| H | -8.62026  | 1.09906  | -4.61884  |
| H | -9.41808  | -0.25531 | -5.43158  |
| H | -5.93193  | -0.64734 | -5.33802  |
| H | -4.90514  | 0.77059  | -5.60082  |
| H | -6.33589  | 0.90311  | -4.58262  |
| H | -8.34210  | 3.79299  | -8.12473  |
| H | -7.76036  | 3.51318  | -6.14382  |
| H | -6.37256  | 3.57485  | -8.71969  |
| H | -5.79890  | 3.30102  | -6.76505  |
| H | -6.95961  | 4.43291  | -7.34639  |

31

OsCp\*H5 less stable isomer

|    |           |          |           |
|----|-----------|----------|-----------|
| C  | -6.26826  | 0.80927  | -8.08159  |
| C  | -7.42060  | 1.05202  | -8.90866  |
| C  | -8.56564  | 1.18378  | -8.04724  |
| C  | -8.12149  | 1.02046  | -6.68832  |
| C  | -6.70152  | 0.78883  | -6.70970  |
| Os | -7.10336  | 2.87955  | -7.55999  |
| C  | -7.44843  | 1.01855  | -10.40690 |
| C  | -9.99084  | 1.31192  | -8.49385  |
| C  | -9.00433  | 0.94587  | -5.47914  |
| C  | -5.85168  | 0.43247  | -5.52744  |
| C  | -4.89076  | 0.47834  | -8.57173  |
| H  | -4.12610  | 0.78245  | -7.85324  |
| H  | -4.67177  | 0.97854  | -9.51778  |
| H  | -4.78758  | -0.60251 | -8.73296  |
| H  | -6.50747  | 1.37436  | -10.83257 |
| H  | -7.61326  | -0.00506 | -10.76734 |
| H  | -8.24911  | 1.64520  | -10.80621 |
| H  | -10.44014 | 0.32149  | -8.64182  |
| H  | -10.06707 | 1.85718  | -9.43726  |
| H  | -10.59433 | 1.84505  | -7.75579  |
| H  | -9.89156  | 1.57296  | -5.59185  |
| H  | -8.47940  | 1.27596  | -4.57993  |
| H  | -9.34204  | -0.08481 | -5.31038  |
| H  | -5.84431  | -0.65390 | -5.37061  |
| H  | -4.81765  | 0.75623  | -5.66602  |
| H  | -6.22330  | 0.89873  | -4.61218  |

|   |          |         |          |
|---|----------|---------|----------|
| H | -6.95460 | 3.85606 | -8.83965 |
| H | -7.73944 | 3.82093 | -6.41034 |
| H | -6.18380 | 3.56252 | -6.41991 |
| H | -8.22302 | 3.99195 | -7.90663 |
| H | -5.69488 | 3.58323 | -7.92576 |

30

OsCp\*H4 -

|    |           |          |           |
|----|-----------|----------|-----------|
| Os | -7.05512  | 2.87785  | -7.50019  |
| C  | -7.35848  | 1.18838  | -8.90056  |
| C  | -8.53503  | 1.21317  | -8.06144  |
| C  | -8.13798  | 0.95438  | -6.71337  |
| C  | -6.71655  | 0.78331  | -6.68822  |
| C  | -6.21659  | 0.91723  | -8.04265  |
| C  | -9.94676  | 1.36263  | -8.54441  |
| C  | -9.05659  | 0.82577  | -5.53626  |
| C  | -5.90622  | 0.37630  | -5.49384  |
| C  | -4.83135  | 0.57632  | -8.50640  |
| C  | -7.34991  | 1.19635  | -10.40037 |
| H  | -4.08610  | 0.84494  | -7.75149  |
| H  | -4.57786  | 1.13015  | -9.41521  |
| H  | -4.71400  | -0.49858 | -8.72514  |
| H  | -6.40682  | 1.59807  | -10.78217 |
| H  | -7.48218  | 0.18749  | -10.82637 |
| H  | -8.14940  | 1.83083  | -10.79503 |
| H  | -10.39706 | 0.38973  | -8.79912  |
| H  | -9.99109  | 1.99269  | -9.43713  |
| H  | -10.57967 | 1.83348  | -7.78632  |
| H  | -9.93982  | 1.46050  | -5.65120  |
| H  | -8.55823  | 1.13001  | -4.61145  |
| H  | -9.40488  | -0.21082 | -5.40278  |
| H  | -5.87175  | -0.71877 | -5.37307  |
| H  | -4.87619  | 0.73324  | -5.58055  |
| H  | -6.31674  | 0.80017  | -4.57244  |
| H  | -7.98092  | 4.04827  | -8.16134  |
| H  | -7.59365  | 3.90193  | -6.33739  |
| H  | -5.80126  | 3.50595  | -6.67229  |
| H  | -6.16106  | 3.83061  | -8.46108  |

32

ReCp\*H6

|   |          |         |          |
|---|----------|---------|----------|
| C | -6.26175 | 0.85723 | -8.07757 |
| C | -7.41269 | 1.09982 | -8.90344 |
| C | -8.55664 | 1.23042 | -8.04345 |
| C | -8.11301 | 1.06703 | -6.68634 |

|    |           |          |           |
|----|-----------|----------|-----------|
| C  | -6.69479  | 0.83621  | -6.70762  |
| Re | -7.09150  | 2.95414  | -7.55435  |
| C  | -7.44199  | 1.05872  | -10.40136 |
| C  | -9.98178  | 1.35159  | -8.49117  |
| C  | -8.99634  | 0.98656  | -5.47813  |
| C  | -5.84621  | 0.47261  | -5.52690  |
| C  | -4.88630  | 0.51935  | -8.56797  |
| H  | -4.12020  | 0.82186  | -7.85118  |
| H  | -4.66657  | 1.01572  | -9.51530  |
| H  | -4.79511  | -0.56297 | -8.72411  |
| H  | -6.50097  | 1.40893  | -10.83029 |
| H  | -7.61034  | 0.03148  | -10.74861 |
| H  | -8.24118  | 1.68491  | -10.80295 |
| H  | -10.42002 | 0.35611  | -8.63582  |
| H  | -10.05864 | 1.89451  | -9.43528  |
| H  | -10.58791 | 1.88314  | -7.75488  |
| H  | -9.88517  | 1.61056  | -5.59030  |
| H  | -8.47335  | 1.31621  | -4.57824  |
| H  | -9.32663  | -0.04757 | -5.31823  |
| H  | -5.84484  | -0.61512 | -5.38216  |
| H  | -4.81220  | 0.79548  | -5.66361  |
| H  | -6.21759  | 0.93377  | -4.60953  |
| H  | -6.99011  | 3.65299  | -9.05220  |
| H  | -7.89349  | 3.61114  | -6.26309  |
| H  | -6.82625  | 4.57305  | -7.44425  |
| H  | -6.10271  | 3.31592  | -6.27635  |
| H  | -8.44141  | 3.81382  | -7.97860  |
| H  | -5.54628  | 3.34307  | -8.00376  |

32

ReCp\*H6 less stable isomer

|    |          |         |           |
|----|----------|---------|-----------|
| Re | -7.08967 | 2.93065 | -7.51944  |
| C  | -7.37308 | 1.09119 | -8.91800  |
| C  | -8.55137 | 1.17431 | -8.08312  |
| C  | -8.14862 | 0.98524 | -6.73171  |
| C  | -6.71618 | 0.77832 | -6.71595  |
| C  | -6.25677 | 0.78733 | -8.07206  |
| C  | -9.96219 | 1.29333 | -8.57385  |
| C  | -9.06013 | 0.86711 | -5.54815  |
| C  | -5.90201 | 0.40882 | -5.51201  |
| C  | -4.87571 | 0.43633 | -8.53429  |
| C  | -7.36385 | 1.11037 | -10.41752 |
| H  | -4.12065 | 0.70789 | -7.79350  |
| H  | -4.62338 | 0.93990 | -9.46990  |

|   |           |          |           |
|---|-----------|----------|-----------|
| H | -4.80428  | -0.64513 | -8.70552  |
| H | -6.40643  | 1.46344  | -10.80751 |
| H | -7.54140  | 0.10581  | -10.82243 |
| H | -8.13884  | 1.77197  | -10.81118 |
| H | -10.38596 | 0.29729  | -8.75441  |
| H | -10.01575 | 1.85459  | -9.50915  |
| H | -10.59967 | 1.80102  | -7.84668  |
| H | -9.95089  | 1.48856  | -5.66295  |
| H | -8.56138  | 1.17221  | -4.62580  |
| H | -9.38950  | -0.17243 | -5.42479  |
| H | -5.91896  | -0.67625 | -5.34783  |
| H | -4.85892  | 0.71318  | -5.62540  |
| H | -6.28478  | 0.89010  | -4.60923  |
| H | -8.22167  | 3.59653  | -8.49778  |
| H | -7.41831  | 3.22754  | -5.94264  |
| H | -6.63925  | 4.14173  | -8.57167  |
| H | -6.03357  | 3.86879  | -6.63609  |
| H | -7.84769  | 4.34063  | -7.07828  |
| H | -5.53370  | 3.10403  | -7.98124  |

31

ReCp\*H5 -

|    |           |          |           |
|----|-----------|----------|-----------|
| C  | -6.25765  | 0.81921  | -8.05560  |
| C  | -7.40783  | 1.11081  | -8.89937  |
| C  | -8.56559  | 1.23577  | -8.01496  |
| C  | -8.10720  | 1.00688  | -6.66514  |
| C  | -6.70826  | 0.74866  | -6.69843  |
| Re | -7.12045  | 2.86874  | -7.63792  |
| C  | -7.44903  | 1.00747  | -10.39344 |
| C  | -9.99766  | 1.32727  | -8.44661  |
| C  | -8.97656  | 0.96380  | -5.44538  |
| C  | -5.85071  | 0.42498  | -5.51323  |
| C  | -4.88234  | 0.47326  | -8.53982  |
| H  | -4.11975  | 0.77023  | -7.81387  |
| H  | -4.65685  | 0.99675  | -9.47243  |
| H  | -4.77301  | -0.60809 | -8.72250  |
| H  | -6.50871  | 1.35059  | -10.83468 |
| H  | -7.62761  | -0.02553 | -10.73681 |
| H  | -8.24126  | 1.64020  | -10.80338 |
| H  | -10.45163 | 0.33290  | -8.59201  |
| H  | -10.08384 | 1.87729  | -9.38752  |
| H  | -10.59747 | 1.86630  | -7.70737  |
| H  | -9.83134  | 1.63638  | -5.55160  |
| H  | -8.42624  | 1.27945  | -4.55466  |

|   |          |          |          |
|---|----------|----------|----------|
| H | -9.36295 | -0.05117 | -5.26355 |
| H | -5.81945 | -0.66003 | -5.33165 |
| H | -4.82524 | 0.77188  | -5.66375 |
| H | -6.22735 | 0.90781  | -4.60756 |
| H | -6.86530 | 4.50234  | -7.59221 |
| H | -8.18091 | 3.68190  | -6.60392 |
| H | -5.98916 | 3.33334  | -6.46543 |
| H | -8.01556 | 3.72269  | -8.77298 |
| H | -5.89083 | 3.38558  | -8.66503 |

77

Complex 1

|    |           |          |           |
|----|-----------|----------|-----------|
| C  | -4.12684  | 4.09326  | -6.99414  |
| Ta | -6.08270  | 4.82313  | -7.58346  |
| C  | -5.78299  | 5.58100  | -9.57118  |
| Ir | -7.62451  | 3.00166  | -7.42176  |
| C  | -8.12494  | 1.21964  | -8.78789  |
| C  | -9.28439  | 1.31839  | -7.92669  |
| C  | -8.86901  | 1.11929  | -6.59191  |
| C  | -7.43611  | 0.89639  | -6.59117  |
| C  | -6.98945  | 0.90686  | -7.95881  |
| C  | -10.68341 | 1.56733  | -8.39853  |
| C  | -9.74200  | 1.10805  | -5.37528  |
| C  | -6.63492  | 0.45216  | -5.40539  |
| C  | -5.64370  | 0.46183  | -8.44447  |
| C  | -8.17228  | 1.14295  | -10.28276 |
| C  | -6.81907  | 6.41234  | -6.30056  |
| H  | -4.85534  | 0.68997  | -7.72275  |
| H  | -5.37535  | 0.93711  | -9.39100  |
| H  | -5.63520  | -0.62455 | -8.60707  |
| H  | -7.21308  | 1.40648  | -10.73356 |
| H  | -8.42432  | 0.12507  | -10.61084 |
| H  | -8.92596  | 1.81653  | -10.69866 |
| H  | -11.16858 | 0.62932  | -8.69856  |
| H  | -10.70027 | 2.23701  | -9.26227  |
| H  | -11.29770 | 2.02151  | -7.61698  |
| H  | -10.63730 | 1.71890  | -5.51604  |
| H  | -9.21337  | 1.49512  | -4.50032  |
| H  | -10.07061 | 0.08785  | -5.13735  |
| H  | -6.75881  | -0.62542 | -5.23130  |
| H  | -5.56845  | 0.64055  | -5.54942  |
| H  | -6.94094  | 0.97120  | -4.49329  |
| H  | -8.41728  | 4.26824  | -8.02327  |
| H  | -7.71646  | 3.82065  | -6.05155  |



|   |          |         |           |
|---|----------|---------|-----------|
| H | -6.07715 | 6.22024 | -5.49031  |
| H | -7.78207 | 6.09948 | -5.87525  |
| C | -6.87236 | 7.93668 | -6.56420  |
| C | -3.34817 | 4.22379 | -5.66418  |
| H | -3.50328 | 4.51891 | -7.80596  |
| H | -4.22643 | 3.02289 | -7.24602  |
| H | -6.44773 | 6.46507 | -9.45727  |
| C | -5.91137 | 5.04578 | -11.00847 |
| H | -4.76112 | 5.99446 | -9.43310  |
| C | -2.06020 | 3.38445 | -5.75154  |
| C | -4.19358 | 3.70866 | -4.49138  |
| C | -2.95502 | 5.68568 | -5.41043  |
| C | -5.05152 | 3.78483 | -11.16792 |
| C | -5.41400 | 6.11237 | -12.00127 |
| C | -7.37863 | 4.72586 | -11.31682 |
| H | -2.36779 | 5.77741 | -4.48921  |
| H | -3.83571 | 6.32736 | -5.30467  |
| H | -2.34800 | 6.08081 | -6.23366  |
| H | -1.47263 | 3.46290 | -4.82860  |
| H | -1.42717 | 3.71828 | -6.58179  |
| H | -2.29147 | 2.32537 | -5.91279  |
| H | -5.10238 | 4.30537 | -4.35639  |
| H | -3.62484 | 3.74690 | -3.55449  |
| H | -4.50389 | 2.67191 | -4.65564  |
| H | -5.10294 | 3.40034 | -12.19359 |
| H | -5.38993 | 2.99596 | -10.48901 |
| H | -3.99824 | 3.99357 | -10.94413 |
| H | -5.99331 | 7.03812 | -11.90807 |
| H | -5.50791 | 5.76178 | -13.03627 |
| H | -4.35967 | 6.35706 | -11.82571 |
| H | -7.48380 | 4.30990 | -12.32587 |
| H | -7.99370 | 5.63231 | -11.26432 |
| H | -7.77805 | 4.00974 | -10.59434 |
| C | -7.14668 | 8.65921 | -5.23171  |
| C | -8.02286 | 8.25379 | -7.53108  |
| C | -5.55038 | 8.46641 | -7.13869  |
| H | -7.87727 | 7.77822 | -8.50682  |
| H | -8.10724 | 9.33423 | -7.69709  |
| H | -8.97903 | 7.89903 | -7.13048  |
| H | -7.22273 | 9.74388 | -5.37775  |
| H | -6.34320 | 8.47381 | -4.50948  |
| H | -8.08509 | 8.31336 | -4.78412  |
| H | -5.59342 | 9.55362 | -7.27396  |

|           |           |          |           |
|-----------|-----------|----------|-----------|
| H         | -5.32282  | 8.02542  | -8.11493  |
| H         | -4.71150  | 8.25096  | -6.46714  |
| 78        |           |          |           |
| Complex 2 |           |          |           |
| C         | -4.47954  | 5.18226  | -6.30847  |
| Ta        | -5.97107  | 4.81434  | -7.83124  |
| C         | -4.81416  | 5.07204  | -9.63982  |
| Os        | -7.30579  | 2.67635  | -7.62305  |
| C         | -9.08155  | 1.52507  | -8.32121  |
| C         | -9.18030  | 1.72984  | -6.88934  |
| C         | -8.06236  | 1.08309  | -6.26798  |
| C         | -7.25694  | 0.47037  | -7.30358  |
| C         | -7.89493  | 0.75017  | -8.56417  |
| C         | -10.31899 | 2.39714  | -6.18153  |
| C         | -7.82346  | 0.95531  | -4.79536  |
| C         | -6.07545  | -0.42340 | -7.08561  |
| C         | -7.45524  | 0.22653  | -9.89640  |
| C         | -10.10768 | 1.91706  | -9.33868  |
| C         | -7.10211  | 6.66129  | -7.78634  |
| H         | -6.37124  | 0.09548  | -9.93705  |
| H         | -7.73961  | 0.90233  | -10.70676 |
| H         | -7.91722  | -0.74885 | -10.09648 |
| H         | -9.65481  | 2.07520  | -10.32082 |
| H         | -10.87563 | 1.13882  | -9.44645  |
| H         | -10.61427 | 2.84447  | -9.05903  |
| H         | -11.12231 | 1.67877  | -5.97079  |
| H         | -10.74535 | 3.20372  | -6.78323  |
| H         | -9.99928  | 2.83022  | -5.23054  |
| H         | -8.25420  | 1.79527  | -4.24491  |
| H         | -6.75542  | 0.92238  | -4.56527  |
| H         | -8.27646  | 0.03327  | -4.40788  |
| H         | -6.38915  | -1.46627 | -6.93962  |
| H         | -5.39257  | -0.39925 | -7.93877  |
| H         | -5.50479  | -0.12330 | -6.20277  |
| H         | -7.91263  | 4.25224  | -7.66583  |
| H         | -6.11868  | 3.23855  | -6.55896  |
| H         | -6.31351  | 7.32085  | -8.21083  |
| H         | -7.10161  | 6.89116  | -6.70312  |
| C         | -8.45946  | 7.07372  | -8.39715  |
| C         | -4.42246  | 4.91086  | -4.78989  |
| H         | -4.38032  | 6.27804  | -6.47215  |
| H         | -3.58168  | 4.74954  | -6.79240  |
| H         | -5.54737  | 5.60171  | -10.27905 |

|   |           |         |           |
|---|-----------|---------|-----------|
| C | -3.97117  | 4.11582 | -10.51007 |
| H | -4.14714  | 5.87651 | -9.25781  |
| C | -3.29059  | 5.74975 | -4.16890  |
| C | -4.13447  | 3.42833 | -4.51894  |
| C | -5.75370  | 5.30792 | -4.13494  |
| C | -3.09948  | 3.22243 | -9.61515  |
| C | -3.05799  | 4.94591 | -11.43062 |
| C | -4.87900  | 3.24087 | -11.38386 |
| H | -5.71423  | 5.16484 | -3.04843  |
| H | -6.57878  | 4.70355 | -4.52769  |
| H | -5.98401  | 6.36445 | -4.31995  |
| H | -3.20947  | 5.56614 | -3.09061  |
| H | -3.46802  | 6.82227 | -4.31232  |
| H | -2.32354  | 5.50577 | -4.62365  |
| H | -4.90754  | 2.78721 | -4.95186  |
| H | -4.09276  | 3.23644 | -3.44032  |
| H | -3.17030  | 3.13162 | -4.94883  |
| H | -2.46472  | 2.56252 | -10.21860 |
| H | -3.71985  | 2.59558 | -8.96469  |
| H | -2.43783  | 3.82479 | -8.98032  |
| H | -3.64671  | 5.60571 | -12.07850 |
| H | -2.45153  | 4.29787 | -12.07474 |
| H | -2.37276  | 5.57302 | -10.84791 |
| H | -4.27871  | 2.57237 | -12.01224 |
| H | -5.49690  | 3.85674 | -12.04812 |
| H | -5.54824  | 2.62767 | -10.77419 |
| C | -8.55960  | 8.60994 | -8.41612  |
| C | -9.61792  | 6.52058 | -7.55713  |
| C | -8.57033  | 6.55014 | -9.83703  |
| H | -9.58530  | 5.42879 | -7.50452  |
| H | -10.58106 | 6.81540 | -7.99012  |
| H | -9.57975  | 6.90881 | -6.53231  |
| H | -9.51994  | 8.93732 | -8.83259  |
| H | -7.76309  | 9.05064 | -9.02748  |
| H | -8.47419  | 9.02360 | -7.40469  |
| H | -9.51695  | 6.86142 | -10.29473 |
| H | -8.52513  | 5.45546 | -9.86094  |
| H | -7.75841  | 6.94101 | -10.46270 |
| H | -6.27331  | 3.10410 | -8.89156  |

79

Dimer complex with Re

|   |          |         |          |
|---|----------|---------|----------|
| C | -7.73388 | 0.59657 | -6.72206 |
| C | -8.62889 | 0.93546 | -7.81153 |

|    |           |          |           |
|----|-----------|----------|-----------|
| C  | -9.52567  | 1.95559  | -7.34756  |
| C  | -9.19587  | 2.26495  | -5.99439  |
| C  | -8.09068  | 1.43857  | -5.59171  |
| Re | -7.29943  | 2.68976  | -7.29254  |
| Ta | -5.49296  | 4.36232  | -7.91112  |
| C  | -5.65223  | 6.36326  | -7.10254  |
| C  | -6.85099  | 7.26383  | -6.73150  |
| C  | -7.91576  | 7.21902  | -7.83708  |
| C  | -8.72305  | 0.21657  | -9.12363  |
| C  | -10.66036 | 2.54157  | -8.13077  |
| C  | -9.92618  | 3.23192  | -5.11301  |
| C  | -7.54267  | 1.32122  | -4.20016  |
| C  | -6.80430  | -0.57976 | -6.68693  |
| C  | -3.46488  | 3.88308  | -7.37399  |
| C  | -2.78656  | 2.96378  | -6.33824  |
| C  | -3.29430  | 3.30868  | -4.93052  |
| C  | -5.59336  | 4.69139  | -10.06049 |
| C  | -4.45207  | 5.02491  | -11.05138 |
| C  | -3.64320  | 3.75961  | -11.37237 |
| C  | -6.35416  | 8.71318  | -6.57532  |
| C  | -7.47105  | 6.81680  | -5.40123  |
| C  | -1.26404  | 3.18915  | -6.38790  |
| C  | -3.07296  | 1.48984  | -6.65175  |
| C  | -3.51857  | 6.11022  | -10.49579 |
| C  | -5.07446  | 5.54320  | -12.36170 |
| H  | -5.98539  | -0.42134 | -5.98046  |
| H  | -6.35783  | -0.76295 | -7.66761  |
| H  | -7.33326  | -1.49294 | -6.38189  |
| H  | -7.75004  | -0.17336 | -9.43191  |
| H  | -9.41924  | -0.63011 | -9.05746  |
| H  | -9.07602  | 0.87904  | -9.91803  |
| H  | -11.57698 | 1.95885  | -7.97194  |
| H  | -10.44670 | 2.54175  | -9.20211  |
| H  | -10.86486 | 3.57324  | -7.83457  |
| H  | -10.36775 | 4.04963  | -5.68806  |
| H  | -9.26324  | 3.67189  | -4.36381  |
| H  | -10.73899 | 2.72401  | -4.57771  |
| H  | -8.11655  | 0.59338  | -3.61075  |
| H  | -6.50099  | 0.99093  | -4.20926  |
| H  | -7.57774  | 2.27865  | -3.67381  |
| H  | -7.80263  | 3.70445  | -8.53307  |
| H  | -7.08951  | 4.28345  | -6.64268  |
| H  | -5.05487  | 6.87554  | -7.88718  |

|   |          |         |           |
|---|----------|---------|-----------|
| H | -4.96780 | 6.29898 | -6.23485  |
| H | -3.05703 | 4.90724 | -7.25718  |
| H | -3.14842 | 3.57639 | -8.39524  |
| H | -6.22549 | 3.90422 | -10.49018 |
| H | -6.26837 | 5.57330 | -9.98894  |
| H | -2.79671 | 2.69028 | -4.17411  |
| H | -4.37395 | 3.14425 | -4.85021  |
| H | -3.09183 | 4.35862 | -4.68516  |
| H | -0.74715 | 2.54682 | -5.66484  |
| H | -1.00872 | 4.22928 | -6.15327  |
| H | -0.86430 | 2.96129 | -7.38288  |
| H | -4.14702 | 1.28406 | -6.64878  |
| H | -2.59314 | 0.83891 | -5.91149  |
| H | -2.68145 | 1.21583 | -7.63882  |
| H | -2.73985 | 6.36607 | -11.22388 |
| H | -3.01414 | 5.78318 | -9.57948  |
| H | -4.07233 | 7.02913 | -10.26913 |
| H | -5.74835 | 4.79751 | -12.79795 |
| H | -4.30021 | 5.77342 | -13.10418 |
| H | -5.65418 | 6.45709 | -12.18834 |
| H | -2.86325 | 3.97379 | -12.11256 |
| H | -4.28944 | 2.97551 | -11.78258 |
| H | -3.15023 | 3.35193 | -10.48362 |
| H | -7.84790 | 5.79183 | -5.46306  |
| H | -8.30624 | 7.47184 | -5.12665  |
| H | -6.73371 | 6.85877 | -4.59043  |
| H | -7.17575 | 9.38362 | -6.29556  |
| H | -5.92277 | 9.08663 | -7.51164  |
| H | -5.58364 | 8.78500 | -5.79896  |
| H | -8.74954 | 7.89213 | -7.60384  |
| H | -8.31731 | 6.20668 | -7.95459  |
| H | -7.49817 | 7.53523 | -8.80097  |
| H | -6.36393 | 2.23341 | -8.61104  |
| H | -5.67738 | 2.73874 | -6.70679  |

80

CO2 reaction - Complex 1 - nucleophilic attack adduct

|    |          |          |          |
|----|----------|----------|----------|
| Ta | -0.67822 | 0.90491  | 0.77723  |
| C  | 0.57893  | 2.38443  | 1.70401  |
| Ir | 0.53507  | -0.98277 | -0.11634 |
| C  | -2.15539 | 0.31223  | 2.24056  |
| C  | -1.83631 | 2.07999  | -0.62616 |
| H  | 1.20971  | 0.45586  | -0.41579 |
| H  | 0.80904  | -0.70282 | 1.45270  |

|   |          |          |          |
|---|----------|----------|----------|
| O | 1.39248  | 3.62959  | -3.67102 |
| C | 2.18743  | 2.78158  | -3.78219 |
| O | 2.98488  | 1.93639  | -3.90050 |
| C | -2.76156 | 1.69450  | -1.79593 |
| C | -3.56200 | 2.92543  | -2.25634 |
| C | -2.06731 | -0.41033 | 3.60339  |
| C | -1.74636 | -1.89335 | 3.39045  |
| C | 0.24978  | -3.23736 | -0.20270 |
| C | -0.24250 | -2.64243 | -1.41765 |
| C | 0.87846  | -2.04767 | -2.09629 |
| C | 2.07323  | -2.35188 | -1.33295 |
| C | 1.68914  | -3.07561 | -0.18291 |
| C | -0.53218 | -4.12881 | 0.71182  |
| C | -1.62571 | -2.80341 | -1.96814 |
| C | 0.88066  | -1.48726 | -3.48581 |
| C | 3.46694  | -1.98092 | -1.73370 |
| C | 2.60029  | -3.60723 | 0.87955  |
| C | 2.07704  | 2.75160  | 1.66967  |
| C | 2.93754  | 1.57605  | 2.15080  |
| C | 2.48567  | 3.13881  | 0.24098  |
| C | 2.32135  | 3.95790  | 2.59511  |
| C | -3.74427 | 0.60363  | -1.34774 |
| C | -1.91386 | 1.18396  | -2.96579 |
| C | -0.98069 | 0.22319  | 4.48365  |
| C | -3.41989 | -0.29258 | 4.32929  |
| H | -0.01076 | 3.29983  | 1.48751  |
| H | 3.89973  | -2.74199 | -2.39638 |
| H | 4.12463  | -1.88763 | -0.86560 |
| H | 3.48954  | -1.02894 | -2.26993 |
| H | 2.11509  | -3.60755 | 1.85892  |
| H | 3.51217  | -3.01047 | 0.96271  |
| H | 2.89747  | -4.64042 | 0.65785  |
| H | -1.58584 | -3.84345 | 0.74896  |
| H | -0.14848 | -4.10135 | 1.73456  |
| H | -0.48214 | -5.17151 | 0.36938  |
| H | -1.70002 | -3.73225 | -2.55019 |
| H | -1.89789 | -1.97740 | -2.62828 |
| H | -2.37274 | -2.85309 | -1.17199 |
| H | 1.59111  | -0.66357 | -3.59083 |
| H | -0.10426 | -1.11598 | -3.77512 |
| H | 1.16504  | -2.26220 | -4.21043 |
| H | -2.43332 | 2.64709  | 0.12211  |
| H | -1.08594 | 2.81266  | -0.98253 |

|   |          |          |          |
|---|----------|----------|----------|
| H | -4.19810 | 3.30892  | -1.44964 |
| H | -4.21189 | 2.67879  | -3.10494 |
| H | -2.89338 | 3.73507  | -2.56982 |
| H | -1.26746 | 1.97949  | -3.35422 |
| H | -2.54600 | 0.83387  | -3.79086 |
| H | -1.27023 | 0.36443  | -2.63363 |
| H | -4.43778 | 0.34168  | -2.15583 |
| H | -3.21214 | -0.30700 | -1.05128 |
| H | -4.34348 | 0.94040  | -0.49307 |
| H | -2.61926 | 1.30858  | 2.40863  |
| H | -2.87252 | -0.22973 | 1.59371  |
| H | -1.65871 | -2.41431 | 4.35140  |
| H | -2.53962 | -2.38460 | 2.81516  |
| H | -0.81049 | -2.01229 | 2.83793  |
| H | -0.97112 | -0.23431 | 5.48009  |
| H | 0.01450  | 0.08604  | 4.04584  |
| H | -1.15194 | 1.29856  | 4.61655  |
| H | -3.40035 | -0.82320 | 5.28913  |
| H | -3.67146 | 0.75532  | 4.53196  |
| H | -4.22869 | -0.72052 | 3.72597  |
| H | 0.29582  | 2.12625  | 2.74890  |
| H | 3.37915  | 4.24829  | 2.59331  |
| H | 1.73503  | 4.82796  | 2.27615  |
| H | 2.04067  | 3.72513  | 3.62896  |
| H | 3.53378  | 3.45969  | 0.20994  |
| H | 2.37158  | 2.28939  | -0.44043 |
| H | 1.87209  | 3.96675  | -0.13475 |
| H | 3.99961  | 1.84926  | 2.14405  |
| H | 2.67486  | 1.29207  | 3.17718  |
| H | 2.79930  | 0.69913  | 1.51254  |

80

CO2 reaction - Complex 1 - nucleophilic attack TS

|    |          |          |          |
|----|----------|----------|----------|
| Ta | -0.22497 | 12.99215 | 8.67763  |
| C  | 1.05056  | 14.45935 | 9.63125  |
| Ir | 0.87845  | 10.90625 | 7.88234  |
| C  | -1.42674 | 12.62039 | 10.47636 |
| C  | -1.95277 | 13.86721 | 7.64605  |
| H  | 1.77985  | 12.07055 | 8.58468  |
| H  | -0.14274 | 11.02831 | 9.15214  |
| O  | 0.73670  | 14.14601 | 6.65356  |
| C  | 1.02141  | 13.29360 | 5.87452  |
| O  | 1.34942  | 12.76990 | 4.88071  |
| C  | -2.99216 | 13.18012 | 6.73035  |

|   |          |          |          |
|---|----------|----------|----------|
| C | -4.11339 | 14.17818 | 6.39090  |
| C | -1.21477 | 11.70975 | 11.71366 |
| C | -1.58955 | 10.25916 | 11.38056 |
| C | 0.29479  | 8.86280  | 7.15987  |
| C | 0.90581  | 9.56118  | 6.06612  |
| C | 2.27298  | 9.84560  | 6.43863  |
| C | 2.51708  | 9.23886  | 7.72672  |
| C | 1.31144  | 8.64327  | 8.17265  |
| C | -1.07804 | 8.26396  | 7.17127  |
| C | 0.30000  | 9.74808  | 4.71154  |
| C | 3.34879  | 10.38539 | 5.54687  |
| C | 3.83396  | 9.21829  | 8.43721  |
| C | 1.12550  | 7.85534  | 9.43072  |
| C | 2.39193  | 15.20157 | 9.43285  |
| C | 3.49998  | 14.25330 | 8.95803  |
| C | 2.22863  | 16.35192 | 8.42769  |
| C | 2.81803  | 15.80836 | 10.78470 |
| C | -3.60846 | 11.96438 | 7.43635  |
| C | -2.33010 | 12.71774 | 5.42607  |
| C | 0.23722  | 11.75847 | 12.20870 |
| C | -2.13798 | 12.19482 | 12.84687 |
| H | 0.27118  | 15.22422 | 9.83966  |
| H | 4.44588  | 8.37343  | 8.09523  |
| H | 3.70683  | 9.11860  | 9.51809  |
| H | 4.40298  | 10.13261 | 8.25215  |
| H | 0.09969  | 7.92033  | 9.80097  |
| H | 1.78874  | 8.20217  | 10.22703 |
| H | 1.34286  | 6.79393  | 9.25416  |
| H | -1.76330 | 8.82584  | 6.53296  |
| H | -1.50209 | 8.25292  | 8.17871  |
| H | -1.05579 | 7.22778  | 6.80811  |
| H | 0.51611  | 8.87174  | 4.08539  |
| H | 0.69726  | 10.62763 | 4.20573  |
| H | -0.78588 | 9.85280  | 4.76685  |
| H | 4.07037  | 10.98552 | 6.10826  |
| H | 2.94240  | 11.01011 | 4.75192  |
| H | 3.90131  | 9.56018  | 5.07788  |
| H | -2.49251 | 14.26793 | 8.52714  |
| H | -1.56269 | 14.75996 | 7.12919  |
| H | -4.62484 | 14.52095 | 7.29803  |
| H | -4.86544 | 13.72270 | 5.73457  |
| H | -3.71324 | 15.06086 | 5.87897  |
| H | -1.88577 | 13.56321 | 4.88683  |



|   |          |          |          |
|---|----------|----------|----------|
| H | -3.06569 | 12.25290 | 4.75814  |
| H | -1.54139 | 11.98594 | 5.63175  |
| H | -4.35305 | 11.47681 | 6.79537  |
| H | -2.83944 | 11.22488 | 7.68635  |
| H | -4.11363 | 12.25813 | 8.36424  |
| H | -1.52826 | 13.66500 | 10.83387 |
| H | -2.41875 | 12.38525 | 10.05495 |
| H | -1.45769 | 9.61434  | 12.25764 |
| H | -2.63716 | 10.18699 | 11.06496 |
| H | -0.96628 | 9.86300  | 10.57366 |
| H | 0.36649  | 11.12955 | 13.09802 |
| H | 0.92999  | 11.40235 | 11.43816 |
| H | 0.52681  | 12.77922 | 12.48562 |
| H | -2.04635 | 11.55624 | 13.73420 |
| H | -1.88995 | 13.21996 | 13.14623 |
| H | -3.18782 | 12.18280 | 12.53178 |
| H | 1.11815  | 13.88118 | 10.57659 |
| H | 3.74516  | 16.38551 | 10.68241 |
| H | 2.04636  | 16.48144 | 11.17635 |
| H | 2.99164  | 15.02583 | 11.53267 |
| H | 3.16773  | 16.90925 | 8.32900  |
| H | 1.94502  | 15.98869 | 7.43791  |
| H | 1.45917  | 17.05821 | 8.76232  |
| H | 4.45795  | 14.78372 | 8.89454  |
| H | 3.62615  | 13.41399 | 9.65112  |
| H | 3.27405  | 13.83742 | 7.97240  |

80

CO2 reaction - Complex 1 - nucleophilic attack product

|    |          |          |          |
|----|----------|----------|----------|
| Ta | -0.71761 | 0.91530  | 0.32955  |
| C  | 0.67666  | 2.20947  | 1.35362  |
| Ir | 0.69904  | -1.31919 | -0.51991 |
| C  | -2.09630 | 0.30577  | 1.91350  |
| C  | -2.13559 | 2.54996  | -0.08568 |
| H  | 1.24044  | 0.04678  | 0.17755  |
| H  | -0.75375 | -1.11978 | 0.25051  |
| O  | -0.82153 | 0.82831  | -1.65736 |
| C  | -0.00229 | -0.17891 | -2.05255 |
| O  | 0.25697  | -0.31808 | -3.23351 |
| C  | -3.37213 | 2.60310  | -1.02474 |
| C  | -4.30662 | 3.72928  | -0.54494 |
| C  | -1.97275 | -0.82012 | 2.96831  |
| C  | -2.37420 | -2.17092 | 2.36488  |
| C  | 0.70347  | -3.59901 | -0.52821 |

|   |          |          |          |
|---|----------|----------|----------|
| C | 1.15529  | -3.13596 | -1.80461 |
| C | 2.35319  | -2.35906 | -1.59276 |
| C | 2.65334  | -2.40144 | -0.17715 |
| C | 1.64797  | -3.17338 | 0.48475  |
| C | -0.45621 | -4.51635 | -0.29825 |
| C | 0.55954  | -3.44597 | -3.13928 |
| C | 3.18899  | -1.76300 | -2.68039 |
| C | 3.87233  | -1.81524 | 0.46294  |
| C | 1.65384  | -3.60715 | 1.91694  |
| C | 1.83101  | 3.08560  | 0.81099  |
| C | 2.96581  | 2.21852  | 0.25048  |
| C | 1.32500  | 4.02569  | -0.29226 |
| C | 2.38627  | 3.93370  | 1.96983  |
| C | -4.15549 | 1.28135  | -1.00961 |
| C | -2.94524 | 2.91616  | -2.46718 |
| C | -0.54261 | -0.89358 | 3.52107  |
| C | -2.93361 | -0.50548 | 4.13028  |
| H | -0.04920 | 2.87187  | 1.86604  |
| H | 4.70399  | -2.52924 | 0.41480  |
| H | 3.69813  | -1.57513 | 1.51428  |
| H | 4.18802  | -0.90078 | -0.04330 |
| H | 0.64096  | -3.71904 | 2.31138  |
| H | 2.17643  | -2.88902 | 2.55378  |
| H | 2.15969  | -4.57547 | 2.02835  |
| H | -1.25945 | -4.33753 | -1.01625 |
| H | -0.87070 | -4.40217 | 0.70549  |
| H | -0.13621 | -5.56046 | -0.40685 |
| H | 1.17942  | -4.18049 | -3.66838 |
| H | 0.49508  | -2.53899 | -3.74617 |
| H | -0.44531 | -3.86378 | -3.04304 |
| H | 3.90287  | -1.03599 | -2.28559 |
| H | 2.54950  | -1.25229 | -3.40505 |
| H | 3.75889  | -2.54116 | -3.20391 |
| H | -2.45667 | 2.84407  | 0.92984  |
| H | -1.44239 | 3.35176  | -0.39768 |
| H | -4.67564 | 3.53574  | 0.46989  |
| H | -5.17744 | 3.82600  | -1.20524 |
| H | -3.78605 | 4.69404  | -0.53473 |
| H | -2.42795 | 3.88219  | -2.51695 |
| H | -3.82534 | 2.97869  | -3.11892 |
| H | -2.27312 | 2.15095  | -2.85870 |
| H | -5.02928 | 1.34344  | -1.66952 |
| H | -3.53316 | 0.45097  | -1.35917 |

|   |          |          |          |
|---|----------|----------|----------|
| H | -4.52415 | 1.04383  | -0.00471 |
| H | -2.04220 | 1.27006  | 2.46160  |
| H | -3.11036 | 0.29333  | 1.49045  |
| H | -2.31640 | -2.96423 | 3.12003  |
| H | -3.40402 | -2.14233 | 1.99020  |
| H | -1.72237 | -2.44255 | 1.53046  |
| H | -0.46140 | -1.65833 | 4.30277  |
| H | 0.17353  | -1.14192 | 2.72950  |
| H | -0.24538 | 0.06376  | 3.96707  |
| H | -2.89458 | -1.29081 | 4.89512  |
| H | -2.67495 | 0.44423  | 4.61308  |
| H | -3.96864 | -0.43147 | 3.77799  |
| H | 1.06455  | 1.54436  | 2.14889  |
| H | 3.20963  | 4.57232  | 1.62859  |
| H | 1.61114  | 4.58431  | 2.39107  |
| H | 2.76773  | 3.29933  | 2.77838  |
| H | 2.13535  | 4.67509  | -0.64280 |
| H | 0.94955  | 3.46697  | -1.15657 |
| H | 0.51845  | 4.67180  | 0.07301  |
| H | 3.80562  | 2.84917  | -0.06372 |
| H | 3.33863  | 1.51782  | 1.00668  |
| H | 2.63789  | 1.63733  | -0.61645 |

80

CO2 reaction - Complex 1 - C - O activation TS

|    |          |          |          |
|----|----------|----------|----------|
| Ta | 0.36336  | 13.22613 | 8.92100  |
| C  | -1.74552 | 13.56059 | 8.47902  |
| C  | 0.59660  | 15.30224 | 9.63109  |
| C  | 0.65639  | 12.73174 | 11.05820 |
| Ir | 0.95988  | 10.49674 | 7.50528  |
| H  | -0.23393 | 11.58334 | 7.37983  |
| H  | 1.07465  | 11.09783 | 9.01948  |
| C  | 2.17686  | 8.63803  | 7.06952  |
| C  | 3.66178  | 8.48511  | 7.18335  |
| C  | 1.19888  | 8.29099  | 8.05962  |
| C  | -0.11366 | 8.49815  | 7.50919  |
| C  | 0.05938  | 8.95285  | 6.14378  |
| C  | 1.46368  | 9.03856  | 5.87390  |
| C  | -1.03978 | 9.16407  | 5.15039  |
| C  | 2.10377  | 9.37575  | 4.56365  |
| C  | 1.48901  | 7.69219  | 9.39848  |
| C  | -1.40701 | 8.08548  | 8.14170  |
| C  | 2.18469  | 11.91793 | 6.94897  |
| O  | 3.12361  | 12.10903 | 6.26407  |

|   |          |          |          |
|---|----------|----------|----------|
| O | 1.72246  | 13.37088 | 7.72398  |
| C | -2.74010 | 13.13542 | 7.37472  |
| C | -3.13375 | 11.66285 | 7.54642  |
| C | 0.44477  | 11.42523 | 11.86215 |
| C | 1.67779  | 10.52151 | 11.73986 |
| C | 0.97127  | 16.51176 | 8.72918  |
| C | 0.11577  | 16.56431 | 7.45543  |
| C | -2.13063 | 13.36107 | 5.98384  |
| C | -4.01487 | 13.99133 | 7.49857  |
| C | 0.26297  | 11.78761 | 13.34807 |
| C | -0.81313 | 10.68502 | 11.38556 |
| C | 0.73799  | 17.80569 | 9.52982  |
| C | 2.45403  | 16.43891 | 8.33747  |
| H | 1.50499  | 6.59781  | 9.31733  |
| H | 0.72995  | 7.95975  | 10.13610 |
| H | 2.45962  | 8.00986  | 9.78479  |
| H | -2.24594 | 8.67326  | 7.76253  |
| H | -1.38240 | 8.20984  | 9.22690  |
| H | -1.62258 | 7.02925  | 7.93307  |
| H | -0.75045 | 9.88157  | 4.37960  |
| H | -1.94752 | 9.53844  | 5.62793  |
| H | -1.28885 | 8.21803  | 4.65310  |
| H | 2.42086  | 8.46031  | 4.04902  |
| H | 2.98132  | 10.01134 | 4.70206  |
| H | 1.41266  | 9.90684  | 3.90560  |
| H | 3.99283  | 8.55906  | 8.22190  |
| H | 4.18405  | 9.25869  | 6.61522  |
| H | 3.98384  | 7.50949  | 6.79704  |
| H | -2.15110 | 13.24315 | 9.46566  |
| H | -1.76014 | 14.66177 | 8.53149  |
| H | -4.47011 | 13.88194 | 8.48986  |
| H | -4.76228 | 13.69561 | 6.75220  |
| H | -3.79347 | 15.05404 | 7.34653  |
| H | -1.83811 | 14.40834 | 5.84971  |
| H | -2.85515 | 13.11497 | 5.19808  |
| H | -1.24156 | 12.74003 | 5.83275  |
| H | -3.82786 | 11.35252 | 6.75602  |
| H | -2.25366 | 11.01494 | 7.51033  |
| H | -3.63325 | 11.50129 | 8.50938  |
| H | 1.64921  | 13.13402 | 11.31610 |
| H | -0.05390 | 13.47999 | 11.46119 |
| H | -0.99365 | 9.78529  | 11.98701 |
| H | -1.70069 | 11.32328 | 11.47912 |

|   |          |          |          |
|---|----------|----------|----------|
| H | -0.72214 | 10.38117 | 10.33694 |
| H | 1.53492  | 9.58857  | 12.29840 |
| H | 1.88868  | 10.26969 | 10.69712 |
| H | 2.56375  | 11.02155 | 12.14878 |
| H | 0.14758  | 10.88674 | 13.96370 |
| H | 1.12857  | 12.34349 | 13.72565 |
| H | -0.62658 | 12.41071 | 13.49780 |
| H | -0.33425 | 15.53806 | 10.17678 |
| H | 1.36606  | 15.23670 | 10.41749 |
| H | 1.02785  | 18.68864 | 8.94654  |
| H | -0.31790 | 17.91745 | 9.80497  |
| H | 1.32688  | 17.80726 | 10.45441 |
| H | 0.37032  | 17.44668 | 6.85597  |
| H | 0.28179  | 15.68102 | 6.82923  |
| H | -0.95327 | 16.62800 | 7.69154  |
| H | 2.72777  | 17.29479 | 7.70874  |
| H | 3.09273  | 16.46425 | 9.22895  |
| H | 2.67460  | 15.52133 | 7.78664  |

80

CO2 reaction - Complex 1 - C - O activation product

|    |          |          |          |
|----|----------|----------|----------|
| Ta | -2.76707 | 5.50946  | 3.61092  |
| C  | -4.82622 | 6.12644  | 3.36198  |
| C  | -1.44400 | 7.09246  | 2.95498  |
| C  | -2.37919 | 5.03020  | 5.68496  |
| Ir | 3.60150  | -7.07974 | -5.36843 |
| H  | 2.38882  | -6.07638 | -5.55278 |
| H  | 3.78253  | -6.07532 | -4.15612 |
| C  | 4.66422  | -9.13785 | -5.40332 |
| C  | 6.11975  | -9.40804 | -5.63079 |
| C  | 4.02597  | -8.95320 | -4.14013 |
| C  | 2.60380  | -8.80485 | -4.37037 |
| C  | 2.37453  | -8.95423 | -5.79256 |
| C  | 3.63820  | -9.13849 | -6.42998 |
| C  | 1.03373  | -9.00242 | -6.45796 |
| C  | 3.86671  | -9.40948 | -7.88520 |
| C  | 4.69058  | -9.00032 | -2.79889 |
| C  | 1.54410  | -8.75080 | -3.31138 |
| C  | 4.57600  | -5.85496 | -6.34179 |
| O  | 5.18342  | -5.07367 | -6.94847 |
| O  | -2.47717 | 4.10705  | 2.65273  |
| C  | -5.74357 | 5.72934  | 2.18384  |
| C  | -6.00574 | 4.21735  | 2.20502  |
| C  | -2.37170 | 3.60698  | 6.28577  |

|   |          |           |          |
|---|----------|-----------|----------|
| C | -1.23444 | 2.78039   | 5.67040  |
| C | -0.10927 | 6.88552   | 2.20386  |
| C | -0.36908 | 6.26621   | 0.82409  |
| C | -5.07582 | 6.11495   | 0.85520  |
| C | -7.08385 | 6.47419   | 2.30724  |
| C | -2.16402 | 3.69572   | 7.80729  |
| C | -3.71606 | 2.92017   | 6.00174  |
| C | 0.58867  | 8.24426   | 2.02308  |
| C | 0.80445  | 5.95649   | 3.01783  |
| H | 4.69310  | -10.02610 | -2.40879 |
| H | 4.17227  | -8.36902  | -2.07397 |
| H | 5.72724  | -8.66017  | -2.85210 |
| H | 0.65303  | -8.22733  | -3.66548 |
| H | 1.89717  | -8.22619  | -2.42055 |
| H | 1.24083  | -9.76097  | -3.00738 |
| H | 1.08741  | -8.66299  | -7.49483 |
| H | 0.30820  | -8.37109  | -5.94054 |
| H | 0.64412  | -10.02839 | -6.45999 |
| H | 3.87340  | -10.48915 | -8.08280 |
| H | 4.82475  | -9.00743  | -8.22410 |
| H | 3.08437  | -8.96347  | -8.50359 |
| H | 6.73741  | -8.96093  | -4.84851 |
| H | 6.45890  | -9.00663  | -6.58901 |
| H | 6.31807  | -10.48759 | -5.63643 |
| H | -5.29952 | 5.81797   | 4.31547  |
| H | -4.77323 | 7.23258   | 3.42194  |
| H | -7.58842 | 6.22578   | 3.24814  |
| H | -7.75974 | 6.20907   | 1.48544  |
| H | -6.93765 | 7.56055   | 2.28185  |
| H | -4.84732 | 7.18745   | 0.82343  |
| H | -5.73383 | 5.89234   | 0.00729  |
| H | -4.14363 | 5.55836   | 0.70563  |
| H | -6.66401 | 3.92733   | 1.37803  |
| H | -5.07298 | 3.65260   | 2.11067  |
| H | -6.49573 | 3.91718   | 3.13913  |
| H | -1.39725 | 5.51140   | 5.86656  |
| H | -3.10558 | 5.65602   | 6.24176  |
| H | -3.75223 | 1.92579   | 6.46135  |
| H | -4.55245 | 3.50264   | 6.40742  |
| H | -3.87419 | 2.79261   | 4.92481  |
| H | -1.21795 | 1.76939   | 6.09355  |
| H | -1.35126 | 2.69406   | 4.58561  |
| H | -0.26019 | 3.24051   | 5.87492  |

|   |          |         |         |
|---|----------|---------|---------|
| H | -2.15140 | 2.69844 | 8.26316 |
| H | -1.21279 | 4.18441 | 8.04790 |
| H | -2.96661 | 4.27091 | 8.28398 |
| H | -2.10870 | 7.73842 | 2.34761 |
| H | -1.25313 | 7.67724 | 3.87764 |
| H | 1.53901  | 8.13242 | 1.48768 |
| H | -0.03884 | 8.93600 | 1.44929 |
| H | 0.80364  | 8.71107 | 2.99160 |
| H | 0.57265  | 6.11895 | 0.28282 |
| H | -0.86563 | 5.29515 | 0.91401 |
| H | -1.00296 | 6.92030 | 0.21338 |
| H | 1.77825  | 5.83930 | 2.52851 |
| H | 0.98575  | 6.35856 | 4.02233 |
| H | 0.36469  | 4.95759 | 3.11984 |

81

CO2 reaction - Complex 2 - nucleophilic attack adduct

|    |          |          |          |
|----|----------|----------|----------|
| C  | -0.50377 | -3.38047 | 0.66813  |
| C  | -1.86602 | -2.97679 | 0.45550  |
| C  | -2.04596 | -2.66802 | -0.94104 |
| C  | -0.77361 | -2.88418 | -1.59546 |
| C  | 0.17329  | -3.32217 | -0.61297 |
| Os | -0.54078 | -1.27335 | -0.06568 |
| Ta | 0.03607  | 1.13315  | 0.43639  |
| C  | 2.04729  | 1.46917  | 1.15250  |
| C  | 2.94567  | 0.72300  | 2.16512  |
| C  | 2.13218  | 0.31026  | 3.40039  |
| C  | -2.94588 | -2.96867 | 1.49354  |
| C  | -3.34342 | -2.34753 | -1.61672 |
| C  | -0.53188 | -2.78187 | -3.06998 |
| C  | 1.57621  | -3.77584 | -0.87451 |
| C  | 0.07475  | -3.91125 | 1.94319  |
| C  | 3.41495  | -0.23048 | -2.93509 |
| O  | 3.60032  | 0.80656  | -2.43050 |
| O  | 3.24276  | -1.26468 | -3.44847 |
| C  | -1.23894 | 1.89934  | 2.05214  |
| C  | -1.49189 | 3.37849  | 2.44959  |
| C  | -2.07674 | 3.40023  | 3.87514  |
| C  | -0.05337 | 2.51542  | -1.21411 |
| C  | -0.79390 | 2.54685  | -2.56712 |
| C  | -2.26473 | 2.14836  | -2.37810 |
| C  | -0.20725 | 4.21869  | 2.44702  |
| C  | -2.52022 | 4.01008  | 1.50058  |
| C  | -0.12130 | 1.58939  | -3.55984 |

|   |          |          |          |
|---|----------|----------|----------|
| C | -0.73133 | 3.97336  | -3.14339 |
| C | 3.56506  | -0.52402 | 1.52011  |
| C | 4.08504  | 1.65955  | 2.60748  |
| H | -0.03812 | -5.00235 | 2.00351  |
| H | -0.41987 | -3.47732 | 2.81604  |
| H | 1.14096  | -3.68418 | 2.02410  |
| H | -3.70787 | -2.21797 | 1.26964  |
| H | -2.54399 | -2.74742 | 2.48534  |
| H | -3.44222 | -3.94648 | 1.54145  |
| H | -3.18996 | -1.73346 | -2.50804 |
| H | -4.01359 | -1.79587 | -0.95224 |
| H | -3.86402 | -3.26290 | -1.93040 |
| H | -0.79602 | -3.72300 | -3.56988 |
| H | 0.51596  | -2.56910 | -3.29345 |
| H | -1.13560 | -1.98845 | -3.51803 |
| H | 2.00610  | -3.27476 | -1.74461 |
| H | 1.60556  | -4.85728 | -1.06382 |
| H | 2.22767  | -3.57370 | -0.02010 |
| H | -0.42227 | 3.36274  | -0.59168 |
| H | 1.01634  | 2.74801  | -1.38001 |
| H | -2.34846 | 1.12800  | -1.98983 |
| H | -2.80636 | 2.20060  | -3.33018 |
| H | -2.76833 | 2.82171  | -1.67452 |
| H | -1.21984 | 4.69227  | -2.47514 |
| H | -1.23454 | 4.02763  | -4.11632 |
| H | 0.30640  | 4.29779  | -3.28390 |
| H | 0.91142  | -0.70430 | 0.57926  |
| H | -1.38012 | -0.26966 | 0.97074  |
| H | -0.44590 | -0.01383 | -1.18368 |
| H | -0.63614 | 1.61290  | -4.52746 |
| H | 0.92296  | 1.87667  | -3.73139 |
| H | -0.13731 | 0.56012  | -3.18909 |
| H | 2.60603  | 1.60647  | 0.20783  |
| H | 1.87493  | 2.50097  | 1.52951  |
| H | 2.77134  | -0.18232 | 4.14293  |
| H | 1.67831  | 1.18360  | 3.88447  |
| H | 1.33145  | -0.38627 | 3.12766  |
| H | 4.21431  | -1.04288 | 2.23508  |
| H | 2.79346  | -1.22423 | 1.18762  |
| H | 4.17523  | -0.25234 | 0.65089  |
| H | 4.75591  | 1.15706  | 3.31482  |
| H | 4.68431  | 1.98394  | 1.74895  |
| H | 3.69212  | 2.55677  | 3.10010  |



|   |          |         |         |
|---|----------|---------|---------|
| H | -2.20807 | 1.38430 | 2.05733 |
| H | -0.67222 | 1.40447 | 2.87121 |
| H | -2.75206 | 5.03777 | 1.80424 |
| H | -2.15610 | 4.04407 | 0.46888 |
| H | -3.45659 | 3.44063 | 1.50338 |
| H | -0.41092 | 5.23876 | 2.79352 |
| H | 0.54922  | 3.78891 | 3.11376 |
| H | 0.23019  | 4.30013 | 1.44481 |
| H | -2.31009 | 4.42416 | 4.19285 |
| H | -3.00035 | 2.81306 | 3.92893 |
| H | -1.36962 | 2.97741 | 4.59799 |

81

CO2 reaction - Complex 2 - nucleophilic attack TS

|    |          |          |          |
|----|----------|----------|----------|
| C  | -0.24293 | 8.25252  | 8.92950  |
| C  | -1.57441 | 8.72331  | 8.67943  |
| C  | -1.72738 | 8.94538  | 7.26861  |
| C  | -0.47201 | 8.60648  | 6.63491  |
| C  | 0.44343  | 8.17917  | 7.65852  |
| Os | -0.12544 | 10.32472 | 8.04301  |
| Ta | 0.47867  | 12.75354 | 8.49958  |
| C  | 2.32144  | 13.19187 | 9.55674  |
| C  | 3.25991  | 12.36240 | 10.46049 |
| C  | 2.45715  | 11.67171 | 11.57230 |
| C  | -2.65207 | 8.88314  | 9.70751  |
| C  | -2.99522 | 9.32087  | 6.56556  |
| C  | -0.24375 | 8.53210  | 5.15684  |
| C  | 1.79185  | 7.56493  | 7.44349  |
| C  | 0.29949  | 7.78649  | 10.24521 |
| C  | 2.16336  | 11.18175 | 6.44294  |
| O  | 2.31242  | 12.31239 | 6.81766  |
| O  | 2.43473  | 10.24115 | 5.78831  |
| C  | -0.88915 | 13.51041 | 10.05695 |
| C  | -1.18723 | 14.95520 | 10.55643 |
| C  | -1.81703 | 14.85360 | 11.95919 |
| C  | 0.17247  | 14.23919 | 6.96173  |
| C  | -0.64860 | 14.29722 | 5.65591  |
| C  | -2.10135 | 13.87166 | 5.91513  |
| C  | 0.06324  | 15.83912 | 10.66025 |
| C  | -2.20779 | 15.63558 | 9.63196  |
| C  | -0.03401 | 13.38638 | 4.58447  |
| C  | -0.64194 | 15.74437 | 5.12809  |
| C  | 4.02162  | 11.30926 | 9.64481  |
| C  | 4.28683  | 13.31056 | 11.10820 |

|   |          |          |          |
|---|----------|----------|----------|
| H | 0.11164  | 6.71386  | 10.38718 |
| H | -0.16217 | 8.31735  | 11.08155 |
| H | 1.37875  | 7.94440  | 10.31021 |
| H | -3.35713 | 9.67009  | 9.42941  |
| H | -2.23851 | 9.13632  | 10.68646 |
| H | -3.21738 | 7.94868  | 9.81336  |
| H | -2.79245 | 9.88098  | 5.64944  |
| H | -3.63357 | 9.94474  | 7.19642  |
| H | -3.57031 | 8.42716  | 6.28886  |
| H | -0.52348 | 7.53973  | 4.77939  |
| H | 0.80153  | 8.71077  | 4.90222  |
| H | -0.84777 | 9.27015  | 4.62299  |
| H | 2.25547  | 7.92663  | 6.52560  |
| H | 1.70219  | 6.47279  | 7.37351  |
| H | 2.47076  | 7.78853  | 8.27057  |
| H | -0.23441 | 15.00286 | 7.65625  |
| H | 1.20811  | 14.56417 | 6.75289  |
| H | -2.15070 | 12.84092 | 6.28174  |
| H | -2.69228 | 13.93467 | 4.99359  |
| H | -2.57807 | 14.51896 | 6.65968  |
| H | -1.08538 | 16.43387 | 5.85604  |
| H | -1.21642 | 15.82669 | 4.19742  |
| H | 0.37941  | 16.08503 | 4.92251  |
| H | 1.25479  | 10.79999 | 8.85602  |
| H | -0.89495 | 11.36199 | 9.08540  |
| H | -0.34928 | 11.54592 | 6.92514  |
| H | -0.58362 | 13.48170 | 3.64052  |
| H | 1.01188  | 13.64990 | 4.39161  |
| H | -0.06911 | 12.33572 | 4.88813  |
| H | 2.92323  | 13.69102 | 8.77682  |
| H | 1.90654  | 14.01453 | 10.17110 |
| H | 3.12092  | 11.10483 | 12.23615 |
| H | 1.92277  | 12.40534 | 12.18810 |
| H | 1.72016  | 10.97787 | 11.15428 |
| H | 4.72819  | 10.76656 | 10.28386 |
| H | 3.33882  | 10.57875 | 9.20057  |
| H | 4.59271  | 11.77522 | 8.83398  |
| H | 4.97579  | 12.76022 | 11.76049 |
| H | 4.88487  | 13.82352 | 10.34617 |
| H | 3.79100  | 14.07606 | 11.71637 |
| H | -1.86493 | 13.02247 | 9.91581  |
| H | -0.43822 | 12.94012 | 10.89750 |
| H | -2.48263 | 16.62310 | 10.02115 |

|   |          |          |          |
|---|----------|----------|----------|
| H | -1.81749 | 15.78029 | 8.62019  |
| H | -3.12453 | 15.03994 | 9.55367  |
| H | -0.20297 | 16.83667 | 11.02973 |
| H | 0.79446  | 15.41905 | 11.36015 |
| H | 0.55733  | 15.97299 | 9.69103  |
| H | -2.08800 | 15.84392 | 12.34583 |
| H | -2.72585 | 14.24155 | 11.93847 |
| H | -1.12099 | 14.39482 | 12.67104 |

81

CO2 reaction - Complex 2 - nucleophilic attack product

|    |          |          |          |
|----|----------|----------|----------|
| C  | -0.95650 | -3.18920 | -1.33686 |
| C  | -0.03179 | -3.58676 | -0.30036 |
| C  | -0.70840 | -3.44358 | 0.96886  |
| C  | -2.04164 | -2.98194 | 0.71611  |
| C  | -2.19451 | -2.80640 | -0.69725 |
| Os | -0.51140 | -1.40475 | -0.03838 |
| Ta | 0.19462  | 1.10428  | 0.26573  |
| C  | -0.43796 | 2.60701  | -1.18683 |
| C  | -0.21757 | 2.72220  | -2.71517 |
| C  | 1.26342  | 2.93911  | -3.05617 |
| C  | 1.31106  | -4.20371 | -0.52974 |
| C  | -0.16384 | -3.84794 | 2.30451  |
| C  | -3.10952 | -2.77682 | 1.74596  |
| C  | -3.46304 | -2.42698 | -1.39749 |
| C  | -0.71931 | -3.32616 | -2.80704 |
| C  | 1.13960  | -0.75458 | -1.25077 |
| O  | 1.70122  | -1.49978 | -2.03458 |
| O  | 1.54146  | 0.52136  | -1.11916 |
| C  | 1.86256  | 1.56172  | 1.59993  |
| C  | 3.36025  | 1.17636  | 1.52817  |
| C  | 4.03737  | 1.81955  | 0.30966  |
| C  | -1.08776 | 2.19254  | 1.69477  |
| C  | -1.38981 | 3.58944  | 2.28538  |
| C  | -0.10135 | 4.31903  | 2.68850  |
| C  | 4.04181  | 1.71576  | 2.80166  |
| C  | 3.55133  | -0.34574 | 1.48928  |
| C  | -2.15662 | 4.45466  | 1.27416  |
| C  | -2.27097 | 3.42740  | 3.53919  |
| C  | -1.00899 | 3.95098  | -3.20697 |
| C  | -0.74822 | 1.48423  | -3.45107 |
| H  | -0.40908 | -4.89710 | 2.51171  |
| H  | -0.58244 | -3.24151 | 3.11106  |
| H  | 0.92240  | -3.74583 | 2.33989  |

|   |          |          |          |
|---|----------|----------|----------|
| H | -3.82135 | -2.00658 | 1.44085  |
| H | -2.68980 | -2.48173 | 2.71021  |
| H | -3.67037 | -3.70759 | 1.89740  |
| H | -3.26082 | -1.93934 | -2.35300 |
| H | -4.06656 | -1.74371 | -0.79555 |
| H | -4.06699 | -3.32081 | -1.59743 |
| H | -0.84329 | -4.37141 | -3.11662 |
| H | 0.29264  | -3.00162 | -3.05567 |
| H | -1.42150 | -2.71959 | -3.38350 |
| H | 1.83866  | -3.67244 | -1.32431 |
| H | 1.20058  | -5.25619 | -0.81916 |
| H | 1.92725  | -4.16620 | 0.37151  |
| H | -1.51697 | 2.71625  | -0.99168 |
| H | 0.01415  | 3.49741  | -0.70434 |
| H | -0.17157 | 0.59020  | -3.20167 |
| H | -0.68831 | 1.62661  | -4.53677 |
| H | -1.79989 | 1.29865  | -3.19894 |
| H | -2.08298 | 3.83615  | -3.01673 |
| H | -0.87347 | 4.09881  | -4.28537 |
| H | -0.67502 | 4.86440  | -2.70072 |
| H | 0.67324  | -1.09186 | 1.05504  |
| H | -1.23308 | -0.37466 | 1.02952  |
| H | -1.20271 | -0.28351 | -1.02393 |
| H | 1.38876  | 3.08365  | -4.13596 |
| H | 1.64967  | 3.83681  | -2.55717 |
| H | 1.87264  | 2.08655  | -2.75150 |
| H | 1.79531  | 2.66452  | 1.61886  |
| H | 1.47973  | 1.25295  | 2.58890  |
| H | 4.61633  | -0.60077 | 1.54759  |
| H | 3.04910  | -0.82671 | 2.33796  |
| H | 3.15815  | -0.77856 | 0.56626  |
| H | 5.11052  | 1.59443  | 0.30510  |
| H | 3.60718  | 1.45346  | -0.62460 |
| H | 3.93005  | 2.91121  | 0.33652  |
| H | 5.11569  | 1.49259  | 2.79572  |
| H | 3.92687  | 2.80314  | 2.88129  |
| H | 3.61134  | 1.26606  | 3.70467  |
| H | -2.05044 | 1.78786  | 1.30857  |
| H | -0.85080 | 1.51240  | 2.54464  |
| H | -2.42619 | 5.41750  | 1.72418  |
| H | -1.56358 | 4.65921  | 0.37929  |
| H | -3.08596 | 3.96524  | 0.95846  |
| H | -0.33619 | 5.27988  | 3.16221  |

|   |          |         |         |
|---|----------|---------|---------|
| H | 0.48723  | 3.73168 | 3.40154 |
| H | 0.52817  | 4.52437 | 1.81605 |
| H | -2.52850 | 4.40160 | 3.97340 |
| H | -3.20711 | 2.91040 | 3.29767 |
| H | -1.75506 | 2.84328 | 4.31053 |

81

CO2 reaction - Complex 2 - C - O activation TS

|    |          |          |          |
|----|----------|----------|----------|
| C  | -0.89912 | 8.42310  | 7.05791  |
| C  | 0.01584  | 8.02898  | 8.11099  |
| C  | -0.63314 | 8.28270  | 9.37343  |
| C  | -1.93652 | 8.82812  | 9.10863  |
| C  | -2.10252 | 8.91301  | 7.68347  |
| Os | -0.33949 | 10.24130 | 8.24938  |
| Ta | 0.51600  | 12.90206 | 8.46094  |
| C  | -0.28966 | 14.45375 | 7.12679  |
| C  | -0.11079 | 14.55944 | 5.59429  |
| C  | 1.34641  | 14.86753 | 5.22525  |
| C  | 1.32508  | 7.33063  | 7.91154  |
| C  | -0.09919 | 7.92464  | 10.72588 |
| C  | -2.98424 | 9.13523  | 10.13393 |
| C  | -3.35788 | 9.32359  | 6.97766  |
| C  | -0.68912 | 8.19919  | 5.59246  |
| C  | 1.20893  | 10.67411 | 7.07861  |
| O  | 1.94698  | 10.23068 | 6.28967  |
| O  | 1.79929  | 12.53026 | 7.22894  |
| C  | 2.06837  | 13.42174 | 9.93040  |
| C  | 3.55906  | 13.01229 | 9.90694  |
| C  | 4.29484  | 13.67338 | 8.73347  |
| C  | -0.84682 | 13.91833 | 9.97277  |
| C  | -1.24639 | 15.23286 | 10.67593 |
| C  | -0.01326 | 15.95155 | 11.24284 |
| C  | 4.20601  | 13.49273 | 11.22097 |
| C  | 3.71909  | 11.48791 | 9.82157  |
| C  | -1.96293 | 16.18009 | 9.70190  |
| C  | -2.21061 | 14.93249 | 11.84047 |
| C  | -0.99697 | 15.71436 | 5.08775  |
| C  | -0.55675 | 13.26744 | 4.89484  |
| H  | -0.42631 | 6.91466  | 11.00181 |
| H  | -0.45575 | 8.61418  | 11.49378 |
| H  | 0.99196  | 7.94027  | 10.74319 |
| H  | -3.66151 | 9.92138  | 9.79419  |
| H  | -2.54191 | 9.46187  | 11.07718 |
| H  | -3.58470 | 8.23988  | 10.33695 |

|   |          |          |          |
|---|----------|----------|----------|
| H | -3.14756 | 9.72209  | 5.98353  |
| H | -3.90073 | 10.08866 | 7.53645  |
| H | -4.02107 | 8.45773  | 6.86109  |
| H | -0.95294 | 7.16915  | 5.32369  |
| H | 0.35230  | 8.36712  | 5.30948  |
| H | -1.30713 | 8.87165  | 4.99391  |
| H | 1.84630  | 7.70866  | 7.02984  |
| H | 1.16435  | 6.25412  | 7.77728  |
| H | 1.98541  | 7.46794  | 8.77031  |
| H | -1.36586 | 14.50342 | 7.35717  |
| H | 0.12795  | 15.36636 | 7.59055  |
| H | 0.09637  | 12.43339 | 5.16571  |
| H | -0.52275 | 13.37958 | 3.80401  |
| H | -1.58783 | 13.00793 | 5.16902  |
| H | -2.05675 | 15.52427 | 5.29759  |
| H | -0.88853 | 15.85186 | 4.00439  |
| H | -0.72575 | 16.65906 | 5.57337  |
| H | 0.75661  | 10.56141 | 9.42011  |
| H | -1.00139 | 11.35232 | 9.24837  |
| H | -1.08534 | 11.35332 | 7.30877  |
| H | 1.45916  | 14.96472 | 4.13823  |
| H | 1.66777  | 15.81433 | 5.67716  |
| H | 2.01185  | 14.07669 | 5.57746  |
| H | 2.01095  | 14.52341 | 9.93669  |
| H | 1.64394  | 13.12693 | 10.90508 |
| H | 4.77395  | 11.19924 | 9.90850  |
| H | 3.17181  | 10.98898 | 10.63224 |
| H | 3.34764  | 11.10948 | 8.86566  |
| H | 5.35940  | 13.40832 | 8.74413  |
| H | 3.86564  | 13.36052 | 7.77908  |
| H | 4.22564  | 14.76640 | 8.80053  |
| H | 5.27563  | 13.24872 | 11.24843 |
| H | 4.10744  | 14.57885 | 11.33300 |
| H | 3.73249  | 13.02341 | 12.09224 |
| H | -1.77611 | 13.51045 | 9.50768  |
| H | -0.60959 | 13.18089 | 10.77418 |
| H | -2.28516 | 17.09207 | 10.21946 |
| H | -1.31343 | 16.47623 | 8.87413  |
| H | -2.85614 | 15.70783 | 9.27479  |
| H | -0.30839 | 16.85476 | 11.79153 |
| H | 0.54358  | 15.30806 | 11.93275 |
| H | 0.66944  | 16.25519 | 10.44250 |
| H | -2.52679 | 15.85180 | 12.35068 |

|   |          |          |          |
|---|----------|----------|----------|
| H | -3.11227 | 14.42362 | 11.47897 |
| H | -1.73584 | 14.28278 | 12.58555 |

81

CO2 reaction - Complex 2 - C - O activation product

|    |          |          |          |
|----|----------|----------|----------|
| C  | -0.61647 | -4.55011 | -0.34673 |
| C  | -1.76758 | -4.84521 | 0.47518  |
| C  | -2.56851 | -3.64984 | 0.54749  |
| C  | -1.92232 | -2.62004 | -0.21754 |
| C  | -0.71905 | -3.17749 | -0.76990 |
| Os | -0.53301 | -3.25241 | 1.51921  |
| Ta | 0.59231  | 2.55140  | -0.04692 |
| C  | -0.39654 | 4.26551  | -0.92793 |
| C  | -0.92847 | 4.33268  | -2.37740 |
| C  | 0.20871  | 4.02177  | -3.36191 |
| C  | -2.14556 | -6.19488 | 1.00677  |
| C  | -3.91529 | -3.53530 | 1.19452  |
| C  | -2.46956 | -1.25572 | -0.50724 |
| C  | 0.19558  | -2.47926 | -1.72967 |
| C  | 0.40652  | -5.54080 | -0.81396 |
| C  | 0.56971  | -4.17533 | 2.69626  |
| O  | 1.25665  | -4.78022 | 3.41646  |
| O  | 0.31441  | 1.18706  | -1.06688 |
| C  | 2.72249  | 2.91464  | 0.04525  |
| C  | 3.82869  | 1.88580  | -0.27793 |
| C  | 3.76780  | 1.49485  | -1.76054 |
| C  | -0.11260 | 1.95012  | 1.91301  |
| C  | -0.67472 | 2.94143  | 2.95809  |
| C  | 0.16887  | 4.22620  | 2.98976  |
| C  | 5.20339  | 2.50774  | 0.02186  |
| C  | 3.64407  | 0.63365  | 0.59207  |
| C  | -2.13127 | 3.29065  | 2.62006  |
| C  | -0.63586 | 2.28871  | 4.35087  |
| C  | -1.46743 | 5.74549  | -2.65945 |
| C  | -2.06176 | 3.31524  | -2.56829 |
| H  | -4.70401 | -3.77456 | 0.47009  |
| H  | -4.09709 | -2.52405 | 1.56482  |
| H  | -4.01588 | -4.22197 | 2.03767  |
| H  | -1.66980 | -0.53309 | -0.68454 |
| H  | -3.08013 | -0.88709 | 0.32078  |
| H  | -3.10474 | -1.28024 | -1.40236 |
| H  | 1.20973  | -2.88154 | -1.67948 |
| H  | 0.24744  | -1.40617 | -1.53224 |
| H  | -0.16745 | -2.61623 | -2.75641 |

|   |          |          |          |
|---|----------|----------|----------|
| H | 0.08138  | -6.02426 | -1.74417 |
| H | 0.57270  | -6.32585 | -0.07244 |
| H | 1.36881  | -5.06096 | -1.00646 |
| H | -1.26203 | -6.79214 | 1.24414  |
| H | -2.73707 | -6.75231 | 0.26905  |
| H | -2.74088 | -6.11360 | 1.91923  |
| H | -1.22807 | 4.47619  | -0.22610 |
| H | 0.31896  | 5.09663  | -0.76645 |
| H | -1.70888 | 2.29586  | -2.38296 |
| H | -2.45391 | 3.35920  | -3.59087 |
| H | -2.89456 | 3.52133  | -1.88482 |
| H | -2.27879 | 6.00382  | -1.96910 |
| H | -1.86006 | 5.82164  | -3.68047 |
| H | -0.67928 | 6.49936  | -2.54762 |
| H | -1.40586 | -3.05950 | 2.87040  |
| H | -0.41968 | -1.79856 | 2.23341  |
| H | 0.84233  | -2.43877 | 1.25831  |
| H | -0.13724 | 4.10542  | -4.39871 |
| H | 1.04428  | 4.72118  | -3.23511 |
| H | 0.58557  | 3.00324  | -3.21679 |
| H | 2.84541  | 3.80178  | -0.60775 |
| H | 2.87405  | 3.30120  | 1.07271  |
| H | 4.45223  | -0.08607 | 0.41789  |
| H | 3.65305  | 0.88646  | 1.65935  |
| H | 2.69818  | 0.12812  | 0.36808  |
| H | 4.54864  | 0.76371  | -1.99975 |
| H | 2.79844  | 1.05395  | -2.01250 |
| H | 3.92458  | 2.36908  | -2.40409 |
| H | 6.01280  | 1.80424  | -0.20668 |
| H | 5.36680  | 3.41131  | -0.57691 |
| H | 5.29051  | 2.78486  | 1.07896  |
| H | -0.75833 | 1.06482  | 1.84112  |
| H | 0.85619  | 1.55096  | 2.28576  |
| H | -2.55329 | 3.97529  | 3.36476  |
| H | -2.21641 | 3.77431  | 1.64040  |
| H | -2.75478 | 2.38998  | 2.60138  |
| H | -0.19331 | 4.92129  | 3.75599  |
| H | 1.21919  | 4.00603  | 3.21576  |
| H | 0.12914  | 4.76478  | 2.03207  |
| H | -1.05387 | 2.95712  | 5.11363  |
| H | -1.21350 | 1.35828  | 4.36306  |
| H | 0.39154  | 2.04494  | 4.64386  |



## E. References

- 1 C. L. Gross and G. S. Girolami, *Organometallics*, 2007, **26**, 160–166.
- 2 R. R. Schrock and J. D. Fellmann, *J. Am. Chem. Soc.*, 1978, **100**, 3359–3370.
- 3 S. Lassalle, R. Jabbour, P. Schiltz, P. Berruyer, T. K. Todorova, L. Veyre, D. Gajan, A. Lesage, C. Thieuleux and C. Camp, *J. Am. Chem. Soc.*, 2019, **141**, 19321–19335.
- 4 D. M. Heinekey, D. A. Fine, T. G. P. Harper and S. T. Michel, *Can. J. Chem.*, 1995, **73**, 1116–1125.
- 5 L. Escomel, I. Del Rosal, L. Maron, E. Jeanneau, L. Veyre, C. Thieuleux and C. Camp, *J. Am. Chem. Soc.*, 2021, **143**, 4844–4856.
- 6 J. K. Hoyano and W. A. G. Graham, *J. Am. Chem. Soc.*, 1982, **104**, 3722–3723.
- 7 APEX2, APEX3, SADABS, TWINABS and SAINT. Bruker AXS. Madison, WI, USA.
- 8 G. M. Sheldrick, *Acta Crystallogr. Sect. Found. Adv.*, 2015, **71**, 3–8.
- 9 G. M. Sheldrick, *Acta Crystallogr. Sect. C Struct. Chem.*, 2015, **71**, 3–8.
- 10 O. V. Dolomanov, L. J. Bourhis, R. J. Gildea, J. A. K. Howard and H. Puschmann, *J. Appl. Crystallogr.*, 2009, **42**, 339–341.
- 11 C. F. Macrae, I. J. Bruno, J. A. Chisholm, P. R. Edgington, P. McCabe, E. Pidcock, L. Rodriguez-Monge, R. Taylor, J. van de Streek and P. A. Wood, *J. Appl. Crystallogr.*, 2008, **41**, 466–470.
- 12 Clark, R. C. & Reid, J. S., *Acta Cryst.* 1995, **A51**, 887–897.
- 13 Rigaku Oxford Diffraction, CrysAlisPro Software system, 2019, version 1.171.40.67a, Rigaku Corporation, Oxford, UK.
